# Supplementary material for: Detection of Horse Locomotion Modifications Due to Training with Inertial Measurement Units: A Proof-of-Concept
Source: MDPI journal article supplement (doi:10.3390/s22134981), 2022-07-01
Supplement: s1 [file s1]

| Gait   | Indicator | Variable     | Axis  | Position | P.Value | Before/Intra | Post/Inter   |
|--------|-----------|--------------|-------|----------|---------|--------------|--------------|
| Canter | CC        | Acceleration | H     | FC left  | 0.027   | 0.28(0.092)  | 0.18(0.14)   |
| Canter | CC        | Acceleration | H     | FC right | 0.16    | 0.27(0.084)  | 0.1(0.17)    |
| Canter | CC        | Acceleration | H     | HC left  | 0.2     | 0.25(0.067)  | 0.15(0.099)  |
| Canter | CC        | Acceleration | H     | HC right | 0.13    | 0.31(0.072)  | 0.23(0.099)  |
| Canter | CC        | Acceleration | H     | FH       | 0.031   | 0.8(0.058)   | 0.76(0.07)   |
| Canter | CC        | Acceleration | H     | Sa       | 0.094   | 0.68(0.091)  | 0.49(0.17)   |
| Canter | CC        | Acceleration | H     | St       | 0.0039  | 0.61(0.14)   | 0.5(0.19)    |
| Canter | CC        | Acceleration | H     | Po       | 0.074   | 0.76(0.09)   | 0.72(0.088)  |
| Canter | CC        | Acceleration | X     | FC left  | 0.055   | 0.34(0.048)  | 0.24(0.1)    |
| Canter | CC        | Acceleration | X     | FC right | 0.031   | 0.31(0.11)   | 0.098(0.098) |
| Canter | CC        | Acceleration | X     | HC left  | 0.039   | 0.39(0.082)  | 0.26(0.12)   |
| Canter | CC        | Acceleration | X     | HC right | 0.039   | 0.4(0.09)    | 0.26(0.12)   |
| Canter | CC        | Acceleration | X     | FH       | 0.016   | 0.94(0.025)  | 0.92(0.039)  |
| Canter | CC        | Acceleration | X     | Sa       | 0.031   | 0.77(0.23)   | 0.67(0.21)   |
| Canter | CC        | Acceleration | X     | St       | 0.0078  | 0.72(0.09)   | 0.59(0.067)  |
| Canter | CC        | Acceleration | X     | Po       | 0.0078  | 0.92(0.038)  | 0.84(0.11)   |
| Canter | CC        | Acceleration | Y     | FC left  | 0.3     | 0.37(0.065)  | 0.3(0.12)    |
| Canter | CC        | Acceleration | Y     | FC right | 0.031   | 0.32(0.074)  | 0.16(0.098)  |
| Canter | CC        | Acceleration | Y     | HC left  | 0.15    | 0.41(0.09)   | 0.33(0.1)    |
| Canter | CC        | Acceleration | Y     | HC right | 0.039   | 0.41(0.075)  | 0.29(0.11)   |
| Canter | CC        | Acceleration | Y     | FH       | 0.16    | 0.23(0.039)  | 0.15(0.12)   |
| Canter | CC        | Acceleration | Y     | Sa       | 0.16    | 0.3(0.26)    | 0.16(0.32)   |
| Canter | CC        | Acceleration | Y     | St       | 0.055   | 0.26(0.084)  | 0.15(0.19)   |
| Canter | CC        | Acceleration | Y     | Po       | 0.5     | 0.34(0.18)   | 0.29(0.19)   |
| Canter | CC        | Acceleration | Z     | FC left  | 0.02    | 0.24(0.074)  | 0.12(0.069)  |
| Canter | CC        | Acceleration | Z     | FC right | 0.031   | 0.28(0.044)  | 0.13(0.083)  |
| Canter | CC        | Acceleration | Z     | HC left  | 0.023   | 0.33(0.096)  | 0.23(0.12)   |
| Canter | CC        | Acceleration | Z     | HC right | 0.012   | 0.36(0.083)  | 0.21(0.14)   |
| Canter | CC        | Acceleration | Z     | FH       | 0.016   | 0.88(0.057)  | 0.81(0.12)   |
| Canter | CC        | Acceleration | Z     | Sa       | 0.063   | 0.93(0.027)  | 0.86(0.091)  |
| Canter | CC        | Acceleration | Z     | St       | 0.039   | 0.92(0.042)  | 0.89(0.03)   |
| Canter | CC        | Acceleration | Z     | Po       | 0.0078  | 0.92(0.054)  | 0.87(0.091)  |
| Canter | CC        | Acceleration | V     | FC left  | 0.0078  | 0.47(0.12)   | 0.31(0.13)   |
| Canter | CC        | Acceleration | V     | FC right | 0.016   | 0.45(0.12)   | 0.28(0.14)   |
| Canter | CC        | Acceleration | V     | HC left  | 0.15    | 0.47(0.051)  | 0.37(0.12)   |
| Canter | CC        | Acceleration | V     | HC right | 0.027   | 0.36(0.081)  | 0.21(0.1)    |
| Canter | CC        | Acceleration | V     | FH       | 0.69    | 0.11(0.12)   | 0.038(0.18)  |
| Canter | CC        | Acceleration | V     | Sa       | 0.063   | 0.9(0.042)   | 0.83(0.074)  |
| Canter | CC        | Acceleration | V     | St       | 0.0039  | 0.91(0.041)  | 0.87(0.041)  |
| Canter | CC        | Acceleration | V     | Po       | 0.039   | 0.63(0.26)   | 0.56(0.27)   |
| Canter | CC        | Angle        | Swing | FC left  | 0.3     | 0.45(0.15)   | 0.42(0.15)   |
| Canter | CC        | Angle        | Swing | FC right | 0.11    | 0.4(0.16)    | 0.31(0.18)   |
| Canter | CC        | Angle        | Swing | HC left  | 0.55    | 0.28(0.14)   | 0.24(0.19)   |
| Canter | CC        | Angle        | Swing | HC right | 0.13    | 0.36(0.16)   | 0.32(0.17)   |
| Canter | CC        | Angle        | Twist | FC left  | 0.0078  | 0.65(0.091)  | 0.15(0.57)   |
| Canter | CC        | Angle        | Twist | FC right | 0.078   | 0.39(0.18)   | 0.08(0.23)   |
| Canter | CC        | Angle        | Twist | HC left  | 0.11    | 0.51(0.12)   | 0.26(0.3)    |
| Canter | CC        | Angle        | Twist | HC right | 0.074   | 0.42(0.16)   | 0.15(0.39)   |
| Canter | CC        | Angle        | X/V   | FC left  | 0.73    | 0.24(0.14)   | 0.22(0.12)   |

|        |          |                  |     |          |        |             |             |
|--------|----------|------------------|-----|----------|--------|-------------|-------------|
| Canter | CC       | Angle            | X/V | FC right | 0.031  | 0.24(0.13)  | 0.13(0.07)  |
| Canter | CC       | Angle            | X/V | HC left  | 0.078  | 0.46(0.11)  | 0.4(0.11)   |
| Canter | CC       | Angle            | X/V | HC right | 0.57   | 0.41(0.14)  | 0.36(0.083) |
| Canter | CC       | Angle            | X/V | FH       | 0.11   | 0.58(0.21)  | 0.31(0.52)  |
| Canter | CC       | Angle            | X/V | Sa       | 0.031  | 0.88(0.25)  | 0.86(0.26)  |
| Canter | CC       | Angle            | X/V | St       | 0.027  | 0.96(0.029) | 0.95(0.038) |
| Canter | CC       | Angle            | X/V | Po       | 0.055  | 0.72(0.21)  | 0.51(0.51)  |
| Canter | CC       | Angle            | Y/V | FC left  | 0.25   | 0.35(0.089) | 0.29(0.15)  |
| Canter | CC       | Angle            | Y/V | FC right | 0.16   | 0.32(0.14)  | 0.18(0.15)  |
| Canter | CC       | Angle            | Y/V | HC left  | 0.64   | 0.53(0.1)   | 0.54(0.099) |
| Canter | CC       | Angle            | Y/V | HC right | 0.91   | 0.51(0.13)  | 0.49(0.095) |
| Canter | CC       | Angle            | Y/V | FH       | 0.078  | 0.3(0.15)   | 0.21(0.22)  |
| Canter | CC       | Angle            | Y/V | Sa       | 1      | 0.28(0.34)  | 0.25(0.37)  |
| Canter | CC       | Angle            | Y/V | St       | 0.91   | 0.13(0.11)  | 0.061(0.15) |
| Canter | CC       | Angle            | Y/V | Po       | 0.91   | 0.32(0.16)  | 0.28(0.24)  |
| Canter | CC       | Angle            | Z/V | FC left  | 0.3    | 0.45(0.15)  | 0.42(0.15)  |
| Canter | CC       | Angle            | Z/V | FC right | 0.11   | 0.4(0.16)   | 0.31(0.18)  |
| Canter | CC       | Angle            | Z/V | HC left  | 0.55   | 0.28(0.14)  | 0.24(0.19)  |
| Canter | CC       | Angle            | Z/V | HC right | 0.13   | 0.36(0.16)  | 0.32(0.17)  |
| Canter | CC       | Angle            | Z/V | FH       | 0.22   | 0.8(0.14)   | 0.7(0.33)   |
| Canter | CC       | Angle            | Z/V | Sa       | 0.094  | 0.82(0.19)  | 0.8(0.22)   |
| Canter | CC       | Angle            | Z/V | St       | 0.012  | 0.74(0.29)  | 0.66(0.37)  |
| Canter | CC       | Angle            | Z/V | Po       | 0.43   | 0.72(0.2)   | 0.66(0.28)  |
| Canter | CC       | Angular Velocity | X   | FC left  | 0.027  | 0.36(0.076) | 0.25(0.13)  |
| Canter | CC       | Angular Velocity | X   | FC right | 0.031  | 0.36(0.073) | 0.15(0.14)  |
| Canter | CC       | Angular Velocity | X   | HC left  | 0.2    | 0.4(0.097)  | 0.29(0.15)  |
| Canter | CC       | Angular Velocity | X   | HC right | 0.02   | 0.38(0.095) | 0.25(0.1)   |
| Canter | CC       | Angular Velocity | X   | FH       | 0.016  | 0.27(0.065) | 0.1(0.12)   |
| Canter | CC       | Angular Velocity | X   | Sa       | 0.063  | 0.27(0.3)   | 0.15(0.36)  |
| Canter | CC       | Angular Velocity | X   | St       | 0.039  | 0.2(0.063)  | 0.075(0.13) |
| Canter | CC       | Angular Velocity | X   | Po       | 0.13   | 0.23(0.18)  | 0.18(0.21)  |
| Canter | CC       | Angular Velocity | Y   | FC left  | 0.02   | 0.41(0.078) | 0.31(0.099) |
| Canter | CC       | Angular Velocity | Y   | FC right | 0.031  | 0.35(0.12)  | 0.23(0.11)  |
| Canter | CC       | Angular Velocity | Y   | HC left  | 0.016  | 0.29(0.11)  | 0.17(0.1)   |
| Canter | CC       | Angular Velocity | Y   | HC right | 0.055  | 0.31(0.083) | 0.2(0.11)   |
| Canter | CC       | Angular Velocity | Y   | FH       | 0.016  | 0.87(0.092) | 0.83(0.11)  |
| Canter | CC       | Angular Velocity | Y   | Sa       | 0.031  | 0.82(0.27)  | 0.76(0.28)  |
| Canter | CC       | Angular Velocity | Y   | St       | 0.02   | 0.89(0.065) | 0.85(0.084) |
| Canter | CC       | Angular Velocity | Y   | Po       | 0.0039 | 0.82(0.12)  | 0.75(0.2)   |
| Canter | CC       | Angular Velocity | Z   | FC left  | 0.65   | 0.34(0.064) | 0.29(0.099) |
| Canter | CC       | Angular Velocity | Z   | FC right | 0.16   | 0.34(0.12)  | 0.2(0.13)   |
| Canter | CC       | Angular Velocity | Z   | HC left  | 0.55   | 0.51(0.08)  | 0.48(0.043) |
| Canter | CC       | Angular Velocity | Z   | HC right | 0.43   | 0.48(0.11)  | 0.42(0.11)  |
| Canter | CC       | Angular Velocity | Z   | FH       | 0.58   | 0.31(0.17)  | 0.27(0.2)   |
| Canter | CC       | Angular Velocity | Z   | Sa       | 0.094  | 0.17(0.051) | 0.12(0.063) |
| Canter | CC       | Angular Velocity | Z   | St       | 0.3    | 0.15(0.06)  | 0.063(0.13) |
| Canter | CC       | Angular Velocity | Z   | Po       | 0.039  | 0.28(0.14)  | 0.14(0.24)  |
| Canter | Duration |                  |     |          | 0.43   | 0.62(0.015) | 0.63(0.015) |
| Canter | LDLJ-A   |                  |     | FC left  | 0.82   | -14.0(0.43) | -14.0(0.27) |
| Canter | LDLJ-A   |                  |     | FC right | 0.94   | -13.0(1.4)  | -14.0(0.28) |

|        |        |              |   |          |        |             |             |
|--------|--------|--------------|---|----------|--------|-------------|-------------|
| Canter | LDLJ-A |              |   | HC left  | 0.55   | -13.0(0.43) | -13.0(0.31) |
| Canter | LDLJ-A |              |   | HC right | 0.91   | -13.0(0.49) | -13.0(0.27) |
| Canter | LDLJ-A |              |   | FH       | 0.078  | -10.0(0.65) | -10.0(0.49) |
| Canter | LDLJ-A |              |   | Sa       | 0.84   | -11.0(0.32) | -11.0(0.26) |
| Canter | LDLJ-A |              |   | St       | 0.73   | -11.0(0.56) | -11.0(0.3)  |
| Canter | LDLJ-A |              |   | Po       | 1      | -11.0(0.59) | -10.0(0.55) |
| Canter | LDLJ-A |              |   | FC left  | 0.36   | -10.0(0.15) | -10.0(0.12) |
| Canter | LDLJ-A |              |   | FC right | 0.81   | -9.9(0.97)  | -10.0(0.15) |
| Canter | LDLJ-A |              |   | HC left  | 1      | -9.8(0.22)  | -9.8(0.22)  |
| Canter | LDLJ-A |              |   | HC right | 0.3    | -9.9(0.2)   | -9.9(0.24)  |
| Canter | LDLJ-A |              |   | FH       | 0.22   | -6.7(0.31)  | -6.9(0.46)  |
| Canter | LDLJ-A |              |   | Sa       | 0.063  | -8.1(0.22)  | -8.1(0.25)  |
| Canter | LDLJ-A |              |   | St       | 1      | -7.8(0.25)  | -7.8(0.29)  |
| Canter | LDLJ-A |              |   | Po       | 0.074  | -7.3(0.28)  | -7.2(0.29)  |
| Canter | RMSD   | Acceleration | H | FC left  | 0.02   | 22.0(2.1)   | 25.0(2.8)   |
| Canter | RMSD   | Acceleration | H | FC right | 0.047  | 25.0(1.8)   | 29.0(3.9)   |
| Canter | RMSD   | Acceleration | H | HC left  | 0.2    | 18.0(1.9)   | 20.0(2.4)   |
| Canter | RMSD   | Acceleration | H | HC right | 0.02   | 22.0(2.3)   | 25.0(2.5)   |
| Canter | RMSD   | Acceleration | H | FH       | 0.031  | 3.5(0.91)   | 4.3(0.65)   |
| Canter | RMSD   | Acceleration | H | Sa       | 0.063  | 3.9(0.7)    | 5.0(0.88)   |
| Canter | RMSD   | Acceleration | H | St       | 0.0039 | 3.1(0.41)   | 3.7(0.79)   |
| Canter | RMSD   | Acceleration | H | Po       | 0.055  | 5.0(1.2)    | 5.5(1.1)    |
| Canter | RMSD   | Acceleration | X | FC left  | 0.02   | 24.0(2.4)   | 27.0(4.5)   |
| Canter | RMSD   | Acceleration | X | FC right | 0.031  | 24.0(3.0)   | 30.0(5.0)   |
| Canter | RMSD   | Acceleration | X | HC left  | 0.023  | 22.0(2.4)   | 25.0(3.8)   |
| Canter | RMSD   | Acceleration | X | HC right | 0.027  | 22.0(2.3)   | 25.0(4.1)   |
| Canter | RMSD   | Acceleration | X | FH       | 0.016  | 3.2(0.8)    | 3.8(0.91)   |
| Canter | RMSD   | Acceleration | X | Sa       | 0.031  | 3.7(1.1)    | 4.9(0.95)   |
| Canter | RMSD   | Acceleration | X | St       | 0.0078 | 3.5(0.52)   | 4.3(0.66)   |
| Canter | RMSD   | Acceleration | X | Po       | 0.0039 | 4.1(1.2)    | 5.4(1.8)    |
| Canter | RMSD   | Acceleration | Y | FC left  | 0.098  | 35.0(3.3)   | 39.0(5.8)   |
| Canter | RMSD   | Acceleration | Y | FC right | 0.031  | 36.0(4.2)   | 43.0(4.6)   |
| Canter | RMSD   | Acceleration | Y | HC left  | 0.11   | 29.0(2.4)   | 32.0(2.9)   |
| Canter | RMSD   | Acceleration | Y | HC right | 0.02   | 28.0(2.7)   | 33.0(4.7)   |
| Canter | RMSD   | Acceleration | Y | FH       | 0.078  | 3.5(0.7)    | 3.7(0.7)    |
| Canter | RMSD   | Acceleration | Y | Sa       | 0.063  | 6.4(1.5)    | 7.4(2.0)    |
| Canter | RMSD   | Acceleration | Y | St       | 0.012  | 3.9(0.49)   | 4.4(0.71)   |
| Canter | RMSD   | Acceleration | Y | Po       | 0.2    | 4.5(1.1)    | 4.7(1.3)    |
| Canter | RMSD   | Acceleration | Z | FC left  | 0.039  | 15.0(3.1)   | 17.0(2.5)   |
| Canter | RMSD   | Acceleration | Z | FC right | 0.016  | 14.0(0.89)  | 16.0(1.3)   |
| Canter | RMSD   | Acceleration | Z | HC left  | 0.039  | 14.0(1.3)   | 15.0(1.8)   |
| Canter | RMSD   | Acceleration | Z | HC right | 0.012  | 15.0(2.0)   | 17.0(3.5)   |
| Canter | RMSD   | Acceleration | Z | FH       | 0.016  | 2.3(1.0)    | 2.8(0.97)   |
| Canter | RMSD   | Acceleration | Z | Sa       | 0.063  | 2.6(0.42)   | 3.9(1.1)    |
| Canter | RMSD   | Acceleration | Z | St       | 0.039  | 2.6(0.52)   | 3.1(0.32)   |
| Canter | RMSD   | Acceleration | Z | Po       | 0.0039 | 2.6(0.83)   | 3.5(1.2)    |
| Canter | RMSD   | Acceleration | V | FC left  | 0.0039 | 31.0(3.0)   | 36.0(3.1)   |
| Canter | RMSD   | Acceleration | V | FC right | 0.031  | 30.0(1.8)   | 36.0(5.1)   |
| Canter | RMSD   | Acceleration | V | HC left  | 0.055  | 28.0(1.7)   | 31.0(4.3)   |
| Canter | RMSD   | Acceleration | V | HC right | 0.039  | 28.0(2.6)   | 33.0(4.6)   |

|        |      |                  |       |          |        |            |             |
|--------|------|------------------|-------|----------|--------|------------|-------------|
| Canter | RMSD | Acceleration     | V     | FH       | 0.58   | 11.0(1.9)  | 12.0(1.8)   |
| Canter | RMSD | Acceleration     | V     | Sa       | 0.063  | 3.1(0.69)  | 4.4(0.86)   |
| Canter | RMSD | Acceleration     | V     | St       | 0.0039 | 2.8(0.49)  | 3.5(0.54)   |
| Canter | RMSD | Acceleration     | V     | Po       | 0.039  | 6.6(3.0)   | 7.3(2.7)    |
| Canter | RMSD | Angle            | Swing | FC left  | 0.0078 | 7.2(1.4)   | 8.1(1.9)    |
| Canter | RMSD | Angle            | Swing | FC right | 0.031  | 8.1(4.7)   | 10.0(5.8)   |
| Canter | RMSD | Angle            | Swing | HC left  | 0.31   | 5.3(1.5)   | 5.8(1.9)    |
| Canter | RMSD | Angle            | Swing | HC right | 0.074  | 4.9(1.7)   | 5.8(1.5)    |
| Canter | RMSD | Angle            | Twist | FC left  | 0.0078 | 66.0(7.7)  | 150.0(78.0) |
| Canter | RMSD | Angle            | Twist | FC right | 0.22   | 79.0(20.0) | 96.0(20.0)  |
| Canter | RMSD | Angle            | Twist | HC left  | 0.11   | 51.0(13.0) | 97.0(64.0)  |
| Canter | RMSD | Angle            | Twist | HC right | 0.098  | 75.0(15.0) | 93.0(18.0)  |
| Canter | RMSD | Angle            | X/V   | FC left  | 0.13   | 13.0(2.0)  | 14.0(1.6)   |
| Canter | RMSD | Angle            | X/V   | FC right | 0.016  | 15.0(6.0)  | 18.0(6.6)   |
| Canter | RMSD | Angle            | X/V   | HC left  | 0.055  | 12.0(1.5)  | 14.0(2.0)   |
| Canter | RMSD | Angle            | X/V   | HC right | 0.0039 | 11.0(1.6)  | 13.0(2.0)   |
| Canter | RMSD | Angle            | X/V   | FH       | 0.16   | 5.3(3.2)   | 5.8(2.9)    |
| Canter | RMSD | Angle            | X/V   | Sa       | 0.094  | 3.1(0.97)  | 3.5(1.0)    |
| Canter | RMSD | Angle            | X/V   | St       | 0.0078 | 3.2(1.2)   | 4.7(1.6)    |
| Canter | RMSD | Angle            | X/V   | Po       | 0.16   | 5.3(2.4)   | 7.9(5.4)    |
| Canter | RMSD | Angle            | Y/V   | FC left  | 0.055  | 23.0(2.6)  | 26.0(2.8)   |
| Canter | RMSD | Angle            | Y/V   | FC right | 0.078  | 23.0(3.2)  | 28.0(4.4)   |
| Canter | RMSD | Angle            | Y/V   | HC left  | 0.46   | 17.0(2.6)  | 18.0(1.9)   |
| Canter | RMSD | Angle            | Y/V   | HC right | 0.039  | 16.0(2.8)  | 18.0(2.7)   |
| Canter | RMSD | Angle            | Y/V   | FH       | 0.078  | 4.4(0.89)  | 5.8(1.3)    |
| Canter | RMSD | Angle            | Y/V   | Sa       | 0.31   | 4.8(1.9)   | 5.2(1.6)    |
| Canter | RMSD | Angle            | Y/V   | St       | 0.3    | 6.1(1.0)   | 6.5(0.75)   |
| Canter | RMSD | Angle            | Y/V   | Po       | 0.02   | 4.7(1.1)   | 6.0(2.0)    |
| Canter | RMSD | Angle            | Z/V   | FC left  | 0.0078 | 7.2(1.4)   | 8.1(1.9)    |
| Canter | RMSD | Angle            | Z/V   | FC right | 0.031  | 8.1(4.7)   | 10.0(5.8)   |
| Canter | RMSD | Angle            | Z/V   | HC left  | 0.31   | 5.3(1.5)   | 5.8(1.9)    |
| Canter | RMSD | Angle            | Z/V   | HC right | 0.074  | 4.9(1.7)   | 5.8(1.5)    |
| Canter | RMSD | Angle            | Z/V   | FH       | 0.16   | 5.7(3.3)   | 8.2(4.2)    |
| Canter | RMSD | Angle            | Z/V   | Sa       | 0.031  | 2.9(0.92)  | 3.3(0.85)   |
| Canter | RMSD | Angle            | Z/V   | St       | 0.02   | 3.4(1.2)   | 4.5(1.6)    |
| Canter | RMSD | Angle            | Z/V   | Po       | 0.074  | 5.5(2.6)   | 7.6(4.5)    |
| Canter | RMSD | Angular Velocity | X     | FC left  | 0.02   | 2.6(0.64)  | 2.8(0.63)   |
| Canter | RMSD | Angular Velocity | X     | FC right | 0.031  | 2.5(0.41)  | 3.1(0.6)    |
| Canter | RMSD | Angular Velocity | X     | HC left  | 0.078  | 2.4(0.36)  | 2.8(0.59)   |
| Canter | RMSD | Angular Velocity | X     | HC right | 0.02   | 2.2(0.4)   | 2.6(0.63)   |
| Canter | RMSD | Angular Velocity | X     | FH       | 0.047  | 0.62(0.14) | 0.68(0.13)  |
| Canter | RMSD | Angular Velocity | X     | Sa       | 0.063  | 1.3(0.51)  | 1.6(0.61)   |
| Canter | RMSD | Angular Velocity | X     | St       | 0.0039 | 0.57(0.1)  | 0.65(0.1)   |
| Canter | RMSD | Angular Velocity | X     | Po       | 0.055  | 0.66(0.22) | 0.7(0.27)   |
| Canter | RMSD | Angular Velocity | Y     | FC left  | 0.02   | 1.3(0.24)  | 1.5(0.28)   |
| Canter | RMSD | Angular Velocity | Y     | FC right | 0.016  | 1.2(0.15)  | 1.4(0.12)   |
| Canter | RMSD | Angular Velocity | Y     | HC left  | 0.0078 | 1.2(0.23)  | 1.3(0.26)   |
| Canter | RMSD | Angular Velocity | Y     | HC right | 0.02   | 1.2(0.26)  | 1.4(0.35)   |
| Canter | RMSD | Angular Velocity | Y     | FH       | 0.016  | 0.51(0.19) | 0.59(0.22)  |
| Canter | RMSD | Angular Velocity | Y     | Sa       | 0.031  | 0.45(0.29) | 0.56(0.26)  |

|        |       |                  |   |          |        |             |             |
|--------|-------|------------------|---|----------|--------|-------------|-------------|
| Canter | RMSD  | Angular Velocity | Y | St       | 0.0078 | 0.37(0.076) | 0.43(0.089) |
| Canter | RMSD  | Angular Velocity | Y | Po       | 0.02   | 0.49(0.16)  | 0.56(0.2)   |
| Canter | RMSD  | Angular Velocity | Z | FC left  | 0.13   | 4.7(0.59)   | 5.2(0.42)   |
| Canter | RMSD  | Angular Velocity | Z | FC right | 0.078  | 4.7(0.71)   | 5.6(0.63)   |
| Canter | RMSD  | Angular Velocity | Z | HC left  | 0.38   | 3.1(0.39)   | 3.3(0.39)   |
| Canter | RMSD  | Angular Velocity | Z | HC right | 0.055  | 3.1(0.39)   | 3.5(0.56)   |
| Canter | RMSD  | Angular Velocity | Z | FH       | 1      | 0.52(0.15)  | 0.54(0.18)  |
| Canter | RMSD  | Angular Velocity | Z | Sa       | 0.031  | 0.42(0.079) | 0.46(0.09)  |
| Canter | RMSD  | Angular Velocity | Z | St       | 0.074  | 0.61(0.059) | 0.68(0.1)   |
| Canter | RMSD  | Angular Velocity | Z | Po       | 0.2    | 0.52(0.1)   | 0.56(0.12)  |
| Canter | SPARC | Acceleration     | H | FC left  | 0.43   | -4.6(0.32)  | -4.5(0.39)  |
| Canter | SPARC | Acceleration     | H | FC right | 0.58   | -4.7(0.55)  | -4.9(0.42)  |
| Canter | SPARC | Acceleration     | H | HC left  | 0.95   | -4.1(0.4)   | -4.1(0.2)   |
| Canter | SPARC | Acceleration     | H | HC right | 0.36   | -5.4(0.69)  | -5.6(0.63)  |
| Canter | SPARC | Acceleration     | H | FH       | 0.94   | -4.4(0.44)  | -4.4(0.34)  |
| Canter | SPARC | Acceleration     | H | Sa       | 0.69   | -4.2(0.13)  | -4.1(0.33)  |
| Canter | SPARC | Acceleration     | H | St       | 0.3    | -4.2(0.43)  | -4.3(0.32)  |
| Canter | SPARC | Acceleration     | H | Po       | 0.82   | -4.4(0.51)  | -4.5(0.32)  |
| Canter | SPARC | Acceleration     | X | FC left  | 0.16   | -6.6(1.1)   | -6.9(1.2)   |
| Canter | SPARC | Acceleration     | X | FC right | 0.69   | -6.3(1.1)   | -6.9(1.4)   |
| Canter | SPARC | Acceleration     | X | HC left  | 0.15   | -6.8(0.59)  | -7.0(0.73)  |
| Canter | SPARC | Acceleration     | X | HC right | 0.25   | -6.8(1.1)   | -7.0(0.88)  |
| Canter | SPARC | Acceleration     | X | FH       | 0.58   | -5.1(0.53)  | -5.3(0.8)   |
| Canter | SPARC | Acceleration     | X | Sa       | 0.84   | -9.9(1.1)   | -10.0(1.1)  |
| Canter | SPARC | Acceleration     | X | St       | 0.5    | -9.9(2.3)   | -10.0(2.1)  |
| Canter | SPARC | Acceleration     | X | Po       | 0.57   | -7.6(1.4)   | -7.6(1.1)   |
| Canter | SPARC | Acceleration     | Y | FC left  | 1      | -9.6(1.3)   | -9.6(1.3)   |
| Canter | SPARC | Acceleration     | Y | FC right | 0.94   | -9.1(1.8)   | -9.6(1.4)   |
| Canter | SPARC | Acceleration     | Y | HC left  | 0.55   | -8.8(0.65)  | -9.1(0.73)  |
| Canter | SPARC | Acceleration     | Y | HC right | 0.43   | -9.0(1.2)   | -9.2(0.64)  |
| Canter | SPARC | Acceleration     | Y | FH       | 0.69   | -11.0(2.1)  | -11.0(1.0)  |
| Canter | SPARC | Acceleration     | Y | Sa       | 0.84   | -11.0(1.7)  | -10.0(0.66) |
| Canter | SPARC | Acceleration     | Y | St       | 0.82   | -11.0(2.2)  | -10.0(2.6)  |
| Canter | SPARC | Acceleration     | Y | Po       | 0.73   | -9.3(2.1)   | -9.2(1.9)   |
| Canter | SPARC | Acceleration     | Z | FC left  | 0.3    | -11.0(3.3)  | -10.0(2.1)  |
| Canter | SPARC | Acceleration     | Z | FC right | 0.69   | -11.0(4.3)  | -10.0(2.8)  |
| Canter | SPARC | Acceleration     | Z | HC left  | 0.84   | -12.0(1.2)  | -11.0(1.2)  |
| Canter | SPARC | Acceleration     | Z | HC right | 0.82   | -11.0(2.1)  | -11.0(1.2)  |
| Canter | SPARC | Acceleration     | Z | FH       | 0.47   | -9.7(2.8)   | -9.2(2.0)   |
| Canter | SPARC | Acceleration     | Z | Sa       | 1      | -4.8(0.29)  | -4.9(0.21)  |
| Canter | SPARC | Acceleration     | Z | St       | 1      | -4.6(0.35)  | -4.7(0.39)  |
| Canter | SPARC | Acceleration     | Z | Po       | 0.91   | -5.3(0.7)   | -5.2(0.96)  |
| Canter | SPARC | Acceleration     | V | FC left  | 0.098  | -8.2(0.87)  | -9.1(1.5)   |
| Canter | SPARC | Acceleration     | V | FC right | 0.38   | -7.5(2.1)   | -8.3(1.6)   |
| Canter | SPARC | Acceleration     | V | HC left  | 0.38   | -11.0(0.95) | -12.0(1.2)  |
| Canter | SPARC | Acceleration     | V | HC right | 1      | -7.5(0.97)  | -7.6(1.2)   |
| Canter | SPARC | Acceleration     | V | FH       | 0.94   | -5.6(1.2)   | -5.7(1.7)   |
| Canter | SPARC | Acceleration     | V | Sa       | 0.69   | -5.1(0.33)  | -5.0(0.43)  |
| Canter | SPARC | Acceleration     | V | St       | 0.82   | -4.7(0.38)  | -4.8(0.42)  |
| Canter | SPARC | Acceleration     | V | Po       | 0.02   | -6.8(1.6)   | -6.2(1.2)   |



|        |       |                  |       |          |       |             |             |
|--------|-------|------------------|-------|----------|-------|-------------|-------------|
| Canter | SPARC | Angle            | Swing | FC left  | 0.13  | -2.4(0.091) | -2.5(0.094) |
| Canter | SPARC | Angle            | Swing | FC right | 0.22  | -2.4(0.087) | -2.4(0.053) |
| Canter | SPARC | Angle            | Swing | HC left  | 0.84  | -2.4(0.063) | -2.4(0.049) |
| Canter | SPARC | Angle            | Swing | HC right | 0.055 | -2.4(0.044) | -2.4(0.072) |
| Canter | SPARC | Angle            | Twist | FC left  | 0.91  | -2.7(0.26)  | -2.7(0.35)  |
| Canter | SPARC | Angle            | Twist | FC right | 0.3   | -2.8(0.38)  | -2.8(0.29)  |
| Canter | SPARC | Angle            | Twist | HC left  | 0.74  | -2.5(0.12)  | -2.5(0.099) |
| Canter | SPARC | Angle            | Twist | HC right | 0.57  | -2.6(0.25)  | -2.5(0.12)  |
| Canter | SPARC | Angle            | X/V   | FC left  | 0.074 | -2.6(0.09)  | -2.7(0.094) |
| Canter | SPARC | Angle            | X/V   | FC right | 0.69  | -2.6(0.13)  | -2.6(0.12)  |
| Canter | SPARC | Angle            | X/V   | HC left  | 0.64  | -2.5(0.12)  | -2.5(0.1)   |
| Canter | SPARC | Angle            | X/V   | HC right | 0.43  | -2.5(0.083) | -2.5(0.098) |
| Canter | SPARC | Angle            | X/V   | FH       | 0.078 | -2.4(0.032) | -2.5(0.017) |
| Canter | SPARC | Angle            | X/V   | Sa       | 0.094 | -2.4(0.026) | -2.5(0.034) |
| Canter | SPARC | Angle            | X/V   | St       | 0.2   | -2.4(0.068) | -2.5(0.046) |
| Canter | SPARC | Angle            | X/V   | Po       | 0.5   | -2.4(0.089) | -2.4(0.041) |
| Canter | SPARC | Angle            | Y/V   | FC left  | 0.2   | -2.7(0.21)  | -2.8(0.15)  |
| Canter | SPARC | Angle            | Y/V   | FC right | 1     | -2.7(0.19)  | -2.8(0.16)  |
| Canter | SPARC | Angle            | Y/V   | HC left  | 0.55  | -2.6(0.1)   | -2.6(0.083) |
| Canter | SPARC | Angle            | Y/V   | HC right | 0.43  | -2.7(0.21)  | -2.8(0.13)  |
| Canter | SPARC | Angle            | Y/V   | FH       | 0.38  | -2.5(0.043) | -2.5(0.037) |
| Canter | SPARC | Angle            | Y/V   | Sa       | 1     | -2.4(0.043) | -2.4(0.047) |
| Canter | SPARC | Angle            | Y/V   | St       | 0.36  | -2.4(0.041) | -2.4(0.039) |
| Canter | SPARC | Angle            | Y/V   | Po       | 0.65  | -2.4(0.062) | -2.4(0.082) |
| Canter | SPARC | Angle            | Z/V   | FC left  | 0.13  | -2.4(0.091) | -2.5(0.094) |
| Canter | SPARC | Angle            | Z/V   | FC right | 0.22  | -2.4(0.087) | -2.4(0.053) |
| Canter | SPARC | Angle            | Z/V   | HC left  | 0.84  | -2.4(0.063) | -2.4(0.049) |
| Canter | SPARC | Angle            | Z/V   | HC right | 0.055 | -2.4(0.044) | -2.4(0.072) |
| Canter | SPARC | Angle            | Z/V   | FH       | 0.47  | -2.5(0.13)  | -2.4(0.072) |
| Canter | SPARC | Angle            | Z/V   | Sa       | 0.22  | -2.9(0.55)  | -2.8(0.57)  |
| Canter | SPARC | Angle            | Z/V   | St       | 0.16  | -2.4(0.04)  | -2.5(0.055) |
| Canter | SPARC | Angle            | Z/V   | Po       | 0.36  | -2.6(0.22)  | -2.5(0.22)  |
| Canter | SPARC | Angular Velocity | X     | FC left  | 0.3   | -12.0(2.1)  | -11.0(1.3)  |
| Canter | SPARC | Angular Velocity | X     | FC right | 0.38  | -12.0(2.8)  | -12.0(1.5)  |
| Canter | SPARC | Angular Velocity | X     | HC left  | 0.25  | -12.0(2.2)  | -12.0(1.1)  |
| Canter | SPARC | Angular Velocity | X     | HC right | 0.36  | -12.0(2.3)  | -12.0(1.1)  |
| Canter | SPARC | Angular Velocity | X     | FH       | 0.58  | -12.0(2.9)  | -11.0(2.1)  |
| Canter | SPARC | Angular Velocity | X     | Sa       | 1     | -11.0(2.8)  | -9.9(2.1)   |
| Canter | SPARC | Angular Velocity | X     | St       | 0.13  | -9.0(1.2)   | -9.5(1.2)   |
| Canter | SPARC | Angular Velocity | X     | Po       | 0.57  | -9.7(1.5)   | -9.3(1.7)   |
| Canter | SPARC | Angular Velocity | Y     | FC left  | 0.65  | -8.4(1.4)   | -8.1(1.0)   |
| Canter | SPARC | Angular Velocity | Y     | FC right | 0.47  | -8.9(2.7)   | -8.4(1.8)   |
| Canter | SPARC | Angular Velocity | Y     | HC left  | 0.95  | -11.0(1.7)  | -11.0(2.4)  |
| Canter | SPARC | Angular Velocity | Y     | HC right | 0.57  | -10.0(1.9)  | -11.0(1.6)  |
| Canter | SPARC | Angular Velocity | Y     | FH       | 0.16  | -7.0(2.2)   | -6.6(1.8)   |
| Canter | SPARC | Angular Velocity | Y     | Sa       | 0.31  | -6.8(1.0)   | -7.1(1.3)   |
| Canter | SPARC | Angular Velocity | Y     | St       | 0.91  | -6.5(0.45)  | -6.4(0.74)  |
| Canter | SPARC | Angular Velocity | Y     | Po       | 0.57  | -7.0(1.8)   | -7.4(2.0)   |
| Canter | SPARC | Angular Velocity | Z     | FC left  | 1     | -6.7(0.66)  | -6.7(0.72)  |
| Canter | SPARC | Angular Velocity | Z     | FC right | 0.81  | -6.4(0.9)   | -6.7(0.56)  |

|        |                |                  |       |          |        |             |             |
|--------|----------------|------------------|-------|----------|--------|-------------|-------------|
| Canter | SPARC          | Angular Velocity | Z     | HC left  | 0.46   | -5.9(0.63)  | -6.1(0.47)  |
| Canter | SPARC          | Angular Velocity | Z     | HC right | 0.82   | -6.0(0.69)  | -6.0(0.35)  |
| Canter | SPARC          | Angular Velocity | Z     | FH       | 0.94   | -8.3(1.4)   | -8.0(0.84)  |
| Canter | SPARC          | Angular Velocity | Z     | Sa       | 0.84   | -9.9(1.3)   | -9.9(1.9)   |
| Canter | SPARC          | Angular Velocity | Z     | St       | 0.82   | -8.4(1.6)   | -8.4(2.1)   |
| Canter | SPARC          | Angular Velocity | Z     | Po       | 0.65   | -11.0(2.8)  | -10.0(2.3)  |
| Canter | PARC per strid | Acceleration     | H     | FC left  | 0.5    | -2.6(0.17)  | -2.6(0.14)  |
| Canter | PARC per strid | Acceleration     | H     | FC right | 1      | -2.6(0.22)  | -2.6(0.15)  |
| Canter | PARC per strid | Acceleration     | H     | HC left  | 0.84   | -2.5(0.12)  | -2.6(0.12)  |
| Canter | PARC per strid | Acceleration     | H     | HC right | 0.57   | -2.1(0.091) | -2.1(0.11)  |
| Canter | PARC per strid | Acceleration     | H     | FH       | 0.69   | -2.3(0.22)  | -2.4(0.2)   |
| Canter | PARC per strid | Acceleration     | H     | Sa       | 0.84   | -2.7(0.46)  | -2.8(0.24)  |
| Canter | PARC per strid | Acceleration     | H     | St       | 1      | -3.0(0.39)  | -3.0(0.31)  |
| Canter | PARC per strid | Acceleration     | H     | Po       | 0.43   | -2.5(0.24)  | -2.4(0.24)  |
| Canter | PARC per strid | Acceleration     | X     | FC left  | 0.25   | -3.0(0.35)  | -3.0(0.34)  |
| Canter | PARC per strid | Acceleration     | X     | FC right | 0.3    | -3.0(0.29)  | -2.9(0.27)  |
| Canter | PARC per strid | Acceleration     | X     | HC left  | 1      | -2.7(0.21)  | -2.7(0.17)  |
| Canter | PARC per strid | Acceleration     | X     | HC right | 0.3    | -2.7(0.072) | -2.7(0.11)  |
| Canter | PARC per strid | Acceleration     | X     | FH       | 0.47   | -2.4(0.2)   | -2.3(0.25)  |
| Canter | PARC per strid | Acceleration     | X     | Sa       | 0.56   | -3.9(0.62)  | -3.9(0.62)  |
| Canter | PARC per strid | Acceleration     | X     | St       | 0.13   | -4.4(0.65)  | -4.6(0.72)  |
| Canter | PARC per strid | Acceleration     | X     | Po       | 0.91   | -3.0(0.32)  | -3.0(0.21)  |
| Canter | PARC per strid | Acceleration     | Y     | FC left  | 1      | -4.0(0.34)  | -4.0(0.32)  |
| Canter | PARC per strid | Acceleration     | Y     | FC right | 0.58   | -3.8(0.36)  | -3.9(0.28)  |
| Canter | PARC per strid | Acceleration     | Y     | HC left  | 0.46   | -3.4(0.35)  | -3.4(0.33)  |
| Canter | PARC per strid | Acceleration     | Y     | HC right | 1      | -3.4(0.29)  | -3.4(0.18)  |
| Canter | PARC per strid | Acceleration     | Y     | FH       | 0.078  | -3.8(0.39)  | -3.4(0.15)  |
| Canter | PARC per strid | Acceleration     | Y     | Sa       | 0.44   | -4.9(1.2)   | -4.8(0.99)  |
| Canter | PARC per strid | Acceleration     | Y     | St       | 0.91   | -4.3(0.71)  | -4.3(0.75)  |
| Canter | PARC per strid | Acceleration     | Y     | Po       | 0.82   | -3.1(0.22)  | -3.1(0.4)   |
| Canter | PARC per strid | Acceleration     | Z     | FC left  | 0.43   | -3.4(0.4)   | -3.3(0.48)  |
| Canter | PARC per strid | Acceleration     | Z     | FC right | 0.69   | -3.4(0.55)  | -3.7(0.61)  |
| Canter | PARC per strid | Acceleration     | Z     | HC left  | 0.55   | -3.7(0.43)  | -3.6(0.46)  |
| Canter | PARC per strid | Acceleration     | Z     | HC right | 0.91   | -3.8(0.58)  | -3.9(0.5)   |
| Canter | PARC per strid | Acceleration     | Z     | FH       | 0.94   | -3.8(0.94)  | -3.9(1.1)   |
| Canter | PARC per strid | Acceleration     | Z     | Sa       | 0.44   | -3.5(0.38)  | -3.4(0.23)  |
| Canter | PARC per strid | Acceleration     | Z     | St       | 1      | -3.4(0.32)  | -3.4(0.3)   |
| Canter | PARC per strid | Acceleration     | Z     | Po       | 0.82   | -2.6(0.36)  | -2.6(0.39)  |
| Canter | PARC per strid | Acceleration     | V     | FC left  | 0.36   | -3.3(0.44)  | -3.5(0.57)  |
| Canter | PARC per strid | Acceleration     | V     | FC right | 0.47   | -2.9(0.34)  | -3.1(0.36)  |
| Canter | PARC per strid | Acceleration     | V     | HC left  | 1      | -2.7(0.24)  | -2.7(0.29)  |
| Canter | PARC per strid | Acceleration     | V     | HC right | 0.16   | -3.2(0.17)  | -3.1(0.17)  |
| Canter | PARC per strid | Acceleration     | V     | FH       | 0.58   | -2.5(0.24)  | -2.4(0.29)  |
| Canter | PARC per strid | Acceleration     | V     | Sa       | 0.44   | -3.5(0.28)  | -3.3(0.24)  |
| Canter | PARC per strid | Acceleration     | V     | St       | 0.73   | -3.4(0.29)  | -3.4(0.33)  |
| Canter | PARC per strid | Acceleration     | V     | Po       | 0.039  | -3.2(0.56)  | -3.0(0.5)   |
| Canter | PARC per strid | Angle            | Swing | FC left  | 0.82   | -2.4(0.037) | -2.4(0.029) |
| Canter | PARC per strid | Angle            | Swing | FC right | 0.81   | -2.4(0.051) | -2.4(0.051) |
| Canter | PARC per strid | Angle            | Swing | HC left  | 0.55   | -2.4(0.032) | -2.4(0.043) |
| Canter | PARC per strid | Angle            | Swing | HC right | 0.0039 | -2.4(0.024) | -2.4(0.022) |

|        |                |                  |       |          |        |              |             |
|--------|----------------|------------------|-------|----------|--------|--------------|-------------|
| Canter | PARC per strid | Angle            | Twist | FC left  | 0.91   | -2.2(0.17)   | -2.3(0.18)  |
| Canter | PARC per strid | Angle            | Twist | FC right | 0.81   | -2.1(0.17)   | -2.1(0.24)  |
| Canter | PARC per strid | Angle            | Twist | HC left  | 0.25   | -2.2(0.25)   | -2.3(0.23)  |
| Canter | PARC per strid | Angle            | Twist | HC right | 0.43   | -2.6(0.19)   | -2.5(0.16)  |
| Canter | PARC per strid | Angle            | X/V   | FC left  | 0.16   | -2.4(0.026)  | -2.4(0.035) |
| Canter | PARC per strid | Angle            | X/V   | FC right | 0.58   | -2.4(0.05)   | -2.4(0.034) |
| Canter | PARC per strid | Angle            | X/V   | HC left  | 0.38   | -2.4(0.018)  | -2.4(0.041) |
| Canter | PARC per strid | Angle            | X/V   | HC right | 0.074  | -2.4(0.035)  | -2.4(0.038) |
| Canter | PARC per strid | Angle            | X/V   | FH       | 0.81   | -2.4(0.039)  | -2.4(0.028) |
| Canter | PARC per strid | Angle            | X/V   | Sa       | 0.44   | -2.3(0.023)  | -2.3(0.018) |
| Canter | PARC per strid | Angle            | X/V   | St       | 0.5    | -2.4(0.045)  | -2.4(0.041) |
| Canter | PARC per strid | Angle            | X/V   | Po       | 0.2    | -2.3(0.063)  | -2.4(0.077) |
| Canter | PARC per strid | Angle            | Y/V   | FC left  | 0.43   | -2.5(0.061)  | -2.5(0.089) |
| Canter | PARC per strid | Angle            | Y/V   | FC right | 0.81   | -1.9(0.14)   | -1.9(0.055) |
| Canter | PARC per strid | Angle            | Y/V   | HC left  | 0.74   | -2.1(0.046)  | -2.1(0.054) |
| Canter | PARC per strid | Angle            | Y/V   | HC right | 0.16   | -2.4(0.085)  | -2.3(0.11)  |
| Canter | PARC per strid | Angle            | Y/V   | FH       | 0.031  | -2.4(0.0098) | -2.4(0.02)  |
| Canter | PARC per strid | Angle            | Y/V   | Sa       | 0.84   | -2.4(0.029)  | -2.4(0.023) |
| Canter | PARC per strid | Angle            | Y/V   | St       | 0.43   | -2.4(0.016)  | -2.4(0.019) |
| Canter | PARC per strid | Angle            | Y/V   | Po       | 0.5    | -2.4(0.016)  | -2.4(0.024) |
| Canter | PARC per strid | Angle            | Z/V   | FC left  | 0.82   | -2.4(0.037)  | -2.4(0.029) |
| Canter | PARC per strid | Angle            | Z/V   | FC right | 0.81   | -2.4(0.051)  | -2.4(0.051) |
| Canter | PARC per strid | Angle            | Z/V   | HC left  | 0.55   | -2.4(0.032)  | -2.4(0.043) |
| Canter | PARC per strid | Angle            | Z/V   | HC right | 0.0039 | -2.4(0.024)  | -2.4(0.022) |
| Canter | PARC per strid | Angle            | Z/V   | FH       | 0.81   | -2.4(0.071)  | -2.4(0.057) |
| Canter | PARC per strid | Angle            | Z/V   | Sa       | 0.44   | -2.1(0.33)   | -2.1(0.24)  |
| Canter | PARC per strid | Angle            | Z/V   | St       | 0.3    | -2.4(0.022)  | -2.4(0.03)  |
| Canter | PARC per strid | Angle            | Z/V   | Po       | 0.65   | -2.2(0.21)   | -2.2(0.19)  |
| Canter | PARC per strid | Angular Velocity | X     | FC left  | 0.82   | -3.1(0.66)   | -3.1(0.61)  |
| Canter | PARC per strid | Angular Velocity | X     | FC right | 0.94   | -3.1(0.5)    | -3.1(0.53)  |
| Canter | PARC per strid | Angular Velocity | X     | HC left  | 1      | -3.6(0.56)   | -3.6(0.62)  |
| Canter | PARC per strid | Angular Velocity | X     | HC right | 0.65   | -3.5(0.31)   | -3.5(0.32)  |
| Canter | PARC per strid | Angular Velocity | X     | FH       | 0.38   | -3.5(0.34)   | -3.3(0.12)  |
| Canter | PARC per strid | Angular Velocity | X     | Sa       | 0.44   | -4.5(0.92)   | -4.3(0.75)  |
| Canter | PARC per strid | Angular Velocity | X     | St       | 0.055  | -3.9(0.51)   | -4.1(0.58)  |
| Canter | PARC per strid | Angular Velocity | X     | Po       | 0.91   | -3.2(0.3)    | -3.2(0.4)   |
| Canter | PARC per strid | Angular Velocity | Y     | FC left  | 0.57   | -3.5(0.74)   | -3.2(0.37)  |
| Canter | PARC per strid | Angular Velocity | Y     | FC right | 0.3    | -3.4(0.53)   | -3.6(0.76)  |
| Canter | PARC per strid | Angular Velocity | Y     | HC left  | 0.46   | -3.5(0.31)   | -3.6(0.29)  |
| Canter | PARC per strid | Angular Velocity | Y     | HC right | 0.73   | -3.4(0.32)   | -3.4(0.23)  |
| Canter | PARC per strid | Angular Velocity | Y     | FH       | 0.3    | -3.3(0.36)   | -3.1(0.19)  |
| Canter | PARC per strid | Angular Velocity | Y     | Sa       | 0.031  | -3.3(0.64)   | -3.6(0.77)  |
| Canter | PARC per strid | Angular Velocity | Y     | St       | 0.039  | -3.2(0.22)   | -3.3(0.23)  |
| Canter | PARC per strid | Angular Velocity | Y     | Po       | 0.73   | -3.2(0.21)   | -3.2(0.34)  |
| Canter | PARC per strid | Angular Velocity | Z     | FC left  | 0.2    | -3.1(0.22)   | -3.0(0.24)  |
| Canter | PARC per strid | Angular Velocity | Z     | FC right | 0.3    | -3.1(0.38)   | -3.3(0.43)  |
| Canter | PARC per strid | Angular Velocity | Z     | HC left  | 0.15   | -2.9(0.071)  | -2.9(0.073) |
| Canter | PARC per strid | Angular Velocity | Z     | HC right | 0.16   | -2.8(0.08)   | -2.9(0.087) |
| Canter | PARC per strid | Angular Velocity | Z     | FH       | 0.69   | -3.0(0.25)   | -3.0(0.31)  |
| Canter | PARC per strid | Angular Velocity | Z     | Sa       | 1      | -4.2(0.76)   | -4.2(0.52)  |



|        |                |                  |      |          |        |             |             |
|--------|----------------|------------------|------|----------|--------|-------------|-------------|
| Canter | PARC per strid | Angular Velocity | Z    | St       | 1      | -4.0(0.58)  | -4.0(0.5)   |
| Canter | PARC per strid | Angular Velocity | Z    | Po       | 0.098  | -3.8(0.55)  | -3.5(0.35)  |
| Canter | PARC per strid | Angular Velocity | Norm | FC left  | 0.43   | -2.2(0.13)  | -2.2(0.13)  |
| Canter | PARC per strid | Angular Velocity | Norm | FC right | 0.38   | -2.3(0.17)  | -2.3(0.14)  |
| Canter | PARC per strid | Angular Velocity | Norm | HC left  | 0.078  | -2.1(0.076) | -2.2(0.085) |
| Canter | PARC per strid | Angular Velocity | Norm | HC right | 1      | -2.2(0.056) | -2.2(0.075) |
| Canter | PARC per strid | Angular Velocity | Norm | FH       | 0.016  | -2.3(0.071) | -2.2(0.054) |
| Canter | PARC per strid | Angular Velocity | Norm | Sa       | 1      | -2.8(0.23)  | -2.8(0.17)  |
| Canter | PARC per strid | Angular Velocity | Norm | St       | 0.2    | -2.5(0.12)  | -2.5(0.086) |
| Canter | PARC per strid | Angular Velocity | Norm | Po       | 0.43   | -2.3(0.1)   | -2.3(0.07)  |
| Canter | SPARC          | Angular Velocity | Norm | FC left  | 0.43   | -3.7(0.26)  | -3.8(0.24)  |
| Canter | SPARC          | Angular Velocity | Norm | FC right | 0.58   | -3.8(0.27)  | -3.9(0.18)  |
| Canter | SPARC          | Angular Velocity | Norm | HC left  | 0.46   | -3.7(0.25)  | -3.6(0.24)  |
| Canter | SPARC          | Angular Velocity | Norm | HC right | 0.5    | -3.6(0.24)  | -3.7(0.2)   |
| Canter | SPARC          | Angular Velocity | Norm | FH       | 0.38   | -3.7(0.44)  | -3.5(0.09)  |
| Canter | SPARC          | Angular Velocity | Norm | Sa       | 1      | -4.1(0.31)  | -4.0(0.22)  |
| Canter | SPARC          | Angular Velocity | Norm | St       | 0.36   | -3.7(0.21)  | -3.8(0.4)   |
| Canter | SPARC          | Angular Velocity | Norm | Po       | 0.3    | -3.7(0.34)  | -3.5(0.18)  |
| Trot   | CC             | Acceleration     | H    | FC left  | 0.02   | 0.62(0.16)  | 0.37(0.25)  |
| Trot   | CC             | Acceleration     | H    | FC right | 0.016  | 0.66(0.15)  | 0.41(0.27)  |
| Trot   | CC             | Acceleration     | H    | HC left  | 0.039  | 0.54(0.18)  | 0.22(0.4)   |
| Trot   | CC             | Acceleration     | H    | HC right | 0.0039 | 0.67(0.16)  | 0.45(0.32)  |
| Trot   | CC             | Acceleration     | H    | FH       | 0.22   | 0.84(0.1)   | 0.81(0.086) |
| Trot   | CC             | Acceleration     | H    | Sa       | 0.031  | 0.53(0.14)  | 0.33(0.28)  |
| Trot   | CC             | Acceleration     | H    | St       | 0.0078 | 0.6(0.13)   | 0.5(0.15)   |
| Trot   | CC             | Acceleration     | H    | Po       | 0.039  | 0.61(0.14)  | 0.51(0.19)  |
| Trot   | CC             | Acceleration     | X    | FC left  | 0.02   | 0.6(0.19)   | 0.33(0.3)   |
| Trot   | CC             | Acceleration     | X    | FC right | 0.016  | 0.6(0.2)    | 0.32(0.34)  |
| Trot   | CC             | Acceleration     | X    | HC left  | 0.016  | 0.62(0.15)  | 0.34(0.33)  |
| Trot   | CC             | Acceleration     | X    | HC right | 0.0039 | 0.59(0.16)  | 0.27(0.27)  |
| Trot   | CC             | Acceleration     | X    | FH       | 0.047  | 0.93(0.025) | 0.91(0.032) |
| Trot   | CC             | Acceleration     | X    | Sa       | 0.031  | 0.76(0.087) | 0.53(0.28)  |
| Trot   | CC             | Acceleration     | X    | St       | 0.0078 | 0.83(0.056) | 0.77(0.058) |
| Trot   | CC             | Acceleration     | X    | Po       | 0.0039 | 0.84(0.081) | 0.76(0.13)  |
| Trot   | CC             | Acceleration     | Y    | FC left  | 0.039  | 0.62(0.2)   | 0.32(0.36)  |
| Trot   | CC             | Acceleration     | Y    | FC right | 0.031  | 0.64(0.19)  | 0.28(0.45)  |
| Trot   | CC             | Acceleration     | Y    | HC left  | 0.055  | 0.65(0.18)  | 0.34(0.4)   |
| Trot   | CC             | Acceleration     | Y    | HC right | 0.0039 | 0.62(0.18)  | 0.29(0.35)  |
| Trot   | CC             | Acceleration     | Y    | FH       | 0.016  | 0.55(0.13)  | 0.22(0.37)  |
| Trot   | CC             | Acceleration     | Y    | Sa       | 0.063  | 0.58(0.25)  | 0.35(0.38)  |
| Trot   | CC             | Acceleration     | Y    | St       | 0.0078 | 0.57(0.21)  | 0.28(0.37)  |
| Trot   | CC             | Acceleration     | Y    | Po       | 0.0039 | 0.63(0.13)  | 0.35(0.39)  |
| Trot   | CC             | Acceleration     | Z    | FC left  | 0.0078 | 0.42(0.14)  | 0.18(0.18)  |
| Trot   | CC             | Acceleration     | Z    | FC right | 0.031  | 0.46(0.14)  | 0.21(0.25)  |
| Trot   | CC             | Acceleration     | Z    | HC left  | 0.11   | 0.56(0.12)  | 0.33(0.34)  |
| Trot   | CC             | Acceleration     | Z    | HC right | 0.0039 | 0.56(0.13)  | 0.24(0.29)  |
| Trot   | CC             | Acceleration     | Z    | FH       | 0.016  | 0.75(0.088) | 0.6(0.21)   |
| Trot   | CC             | Acceleration     | Z    | Sa       | 0.031  | 0.96(0.033) | 0.93(0.05)  |
| Trot   | CC             | Acceleration     | Z    | St       | 0.055  | 0.94(0.041) | 0.93(0.04)  |
| Trot   | CC             | Acceleration     | Z    | Po       | 0.0039 | 0.94(0.025) | 0.91(0.031) |

|      |    |                  |       |          |        |             |              |
|------|----|------------------|-------|----------|--------|-------------|--------------|
| Trot | CC | Acceleration     | V     | FC left  | 0.012  | 0.26(0.13)  | 0.039(0.21)  |
| Trot | CC | Acceleration     | V     | FC right | 0.047  | 0.22(0.16)  | 0.02(0.19)   |
| Trot | CC | Acceleration     | V     | HC left  | 0.055  | 0.2(0.16)   | 0.02(0.19)   |
| Trot | CC | Acceleration     | V     | HC right | 0.02   | 0.22(0.13)  | 0.085(0.14)  |
| Trot | CC | Acceleration     | V     | FH       | 0.58   | 0.064(0.11) | 0.08(0.14)   |
| Trot | CC | Acceleration     | V     | Sa       | 0.031  | 0.95(0.031) | 0.93(0.049)  |
| Trot | CC | Acceleration     | V     | St       | 0.039  | 0.94(0.037) | 0.93(0.046)  |
| Trot | CC | Acceleration     | V     | Po       | 0.055  | 0.76(0.23)  | 0.72(0.23)   |
| Trot | CC | Angle            | Swing | FC left  | 0.074  | 0.7(0.27)   | 0.27(0.66)   |
| Trot | CC | Angle            | Swing | FC right | 0.11   | 0.78(0.28)  | 0.4(0.57)    |
| Trot | CC | Angle            | Swing | HC left  | 0.46   | 0.78(0.27)  | 0.4(0.66)    |
| Trot | CC | Angle            | Swing | HC right | 0.098  | 0.73(0.25)  | 0.25(0.62)   |
| Trot | CC | Angle            | Twist | FC left  | 0.055  | 0.38(0.46)  | 0.0096(0.62) |
| Trot | CC | Angle            | Twist | FC right | 0.078  | 0.69(0.37)  | -0.054(0.83) |
| Trot | CC | Angle            | Twist | HC left  | 0.46   | 0.35(0.45)  | 0.12(0.59)   |
| Trot | CC | Angle            | Twist | HC right | 0.039  | 0.66(0.4)   | -0.33(0.67)  |
| Trot | CC | Angle            | X/V   | FC left  | 0.039  | 0.84(0.17)  | 0.51(0.5)    |
| Trot | CC | Angle            | X/V   | FC right | 0.016  | 0.88(0.17)  | 0.37(0.76)   |
| Trot | CC | Angle            | X/V   | HC left  | 0.11   | 0.78(0.28)  | 0.27(0.72)   |
| Trot | CC | Angle            | X/V   | HC right | 0.36   | 0.84(0.23)  | 0.46(0.73)   |
| Trot | CC | Angle            | X/V   | FH       | 0.81   | 0.19(0.14)  | 0.079(0.26)  |
| Trot | CC | Angle            | X/V   | Sa       | 0.031  | 0.82(0.13)  | 0.69(0.24)   |
| Trot | CC | Angle            | X/V   | St       | 0.0039 | 0.9(0.069)  | 0.82(0.15)   |
| Trot | CC | Angle            | X/V   | Po       | 0.82   | 0.38(0.19)  | 0.32(0.24)   |
| Trot | CC | Angle            | Y/V   | FC left  | 1      | 0.75(0.31)  | 0.36(0.74)   |
| Trot | CC | Angle            | Y/V   | FC right | 0.47   | 0.82(0.31)  | 0.29(0.85)   |
| Trot | CC | Angle            | Y/V   | HC left  | 0.95   | 0.78(0.32)  | 0.32(0.8)    |
| Trot | CC | Angle            | Y/V   | HC right | 1      | 0.75(0.31)  | 0.35(0.75)   |
| Trot | CC | Angle            | Y/V   | FH       | 0.3    | 0.42(0.23)  | 0.24(0.36)   |
| Trot | CC | Angle            | Y/V   | Sa       | 1      | 0.61(0.29)  | 0.49(0.48)   |
| Trot | CC | Angle            | Y/V   | St       | 0.16   | 0.59(0.27)  | 0.22(0.59)   |
| Trot | CC | Angle            | Y/V   | Po       | 0.73   | 0.39(0.19)  | 0.24(0.33)   |
| Trot | CC | Angle            | Z/V   | FC left  | 0.074  | 0.7(0.27)   | 0.27(0.66)   |
| Trot | CC | Angle            | Z/V   | FC right | 0.11   | 0.78(0.28)  | 0.4(0.57)    |
| Trot | CC | Angle            | Z/V   | HC left  | 0.46   | 0.78(0.27)  | 0.4(0.66)    |
| Trot | CC | Angle            | Z/V   | HC right | 0.098  | 0.73(0.25)  | 0.25(0.62)   |
| Trot | CC | Angle            | Z/V   | FH       | 1      | 0.39(0.14)  | 0.35(0.19)   |
| Trot | CC | Angle            | Z/V   | Sa       | 0.031  | 0.7(0.19)   | 0.55(0.26)   |
| Trot | CC | Angle            | Z/V   | St       | 0.0039 | 0.72(0.26)  | 0.66(0.28)   |
| Trot | CC | Angle            | Z/V   | Po       | 0.3    | 0.37(0.15)  | 0.28(0.2)    |
| Trot | CC | Angular Velocity | X     | FC left  | 0.0039 | 0.7(0.12)   | 0.43(0.21)   |
| Trot | CC | Angular Velocity | X     | FC right | 0.016  | 0.73(0.097) | 0.48(0.27)   |
| Trot | CC | Angular Velocity | X     | HC left  | 0.039  | 0.74(0.12)  | 0.49(0.38)   |
| Trot | CC | Angular Velocity | X     | HC right | 0.0039 | 0.71(0.11)  | 0.42(0.35)   |
| Trot | CC | Angular Velocity | X     | FH       | 0.016  | 0.5(0.14)   | 0.11(0.34)   |
| Trot | CC | Angular Velocity | X     | Sa       | 0.16   | 0.64(0.25)  | 0.59(0.21)   |
| Trot | CC | Angular Velocity | X     | St       | 0.039  | 0.67(0.22)  | 0.27(0.57)   |
| Trot | CC | Angular Velocity | X     | Po       | 0.0078 | 0.51(0.17)  | 0.22(0.31)   |
| Trot | CC | Angular Velocity | Y     | FC left  | 0.02   | 0.67(0.23)  | 0.26(0.44)   |
| Trot | CC | Angular Velocity | Y     | FC right | 0.047  | 0.71(0.24)  | 0.32(0.47)   |

|      |          |                  |   |          |        |             |             |
|------|----------|------------------|---|----------|--------|-------------|-------------|
| Trot | CC       | Angular Velocity | Y | HC left  | 0.039  | 0.63(0.17)  | 0.35(0.43)  |
| Trot | CC       | Angular Velocity | Y | HC right | 0.012  | 0.6(0.16)   | 0.23(0.37)  |
| Trot | CC       | Angular Velocity | Y | FH       | 0.031  | 0.64(0.13)  | 0.48(0.29)  |
| Trot | CC       | Angular Velocity | Y | Sa       | 0.031  | 0.84(0.085) | 0.76(0.12)  |
| Trot | CC       | Angular Velocity | Y | St       | 0.0078 | 0.89(0.075) | 0.83(0.13)  |
| Trot | CC       | Angular Velocity | Y | Po       | 0.02   | 0.56(0.18)  | 0.4(0.32)   |
| Trot | CC       | Angular Velocity | Z | FC left  | 0.43   | 0.76(0.26)  | 0.42(0.6)   |
| Trot | CC       | Angular Velocity | Z | FC right | 0.16   | 0.82(0.25)  | 0.37(0.71)  |
| Trot | CC       | Angular Velocity | Z | HC left  | 0.078  | 0.78(0.27)  | 0.33(0.65)  |
| Trot | CC       | Angular Velocity | Z | HC right | 0.43   | 0.75(0.26)  | 0.43(0.58)  |
| Trot | CC       | Angular Velocity | Z | FH       | 0.11   | 0.54(0.24)  | 0.3(0.34)   |
| Trot | CC       | Angular Velocity | Z | Sa       | 0.31   | 0.58(0.25)  | 0.5(0.19)   |
| Trot | CC       | Angular Velocity | Z | St       | 0.098  | 0.7(0.28)   | 0.22(0.7)   |
| Trot | CC       | Angular Velocity | Z | Po       | 0.0078 | 0.51(0.16)  | 0.13(0.37)  |
| Trot | Duration |                  |   |          | 0.65   | 0.84(0.043) | 0.83(0.049) |
| Trot | LDLJ-A   |                  |   | FC left  | 0.73   | -14.0(0.58) | -14.0(0.31) |
| Trot | LDLJ-A   |                  |   | FC right | 0.47   | -14.0(0.6)  | -14.0(0.29) |
| Trot | LDLJ-A   |                  |   | HC left  | 0.46   | -13.0(0.62) | -13.0(0.45) |
| Trot | LDLJ-A   |                  |   | HC right | 0.43   | -13.0(0.56) | -13.0(0.39) |
| Trot | LDLJ-A   |                  |   | FH       | 0.69   | -10.0(0.43) | -10.0(0.32) |
| Trot | LDLJ-A   |                  |   | Sa       | 1      | -12.0(0.44) | -12.0(0.41) |
| Trot | LDLJ-A   |                  |   | St       | 0.65   | -11.0(0.55) | -11.0(0.32) |
| Trot | LDLJ-A   |                  |   | Po       | 0.65   | -11.0(0.4)  | -11.0(0.3)  |
| Trot | LDLJ-A   |                  |   | FC left  | 1      | -10.0(0.24) | -10.0(0.21) |
| Trot | LDLJ-A   |                  |   | FC right | 0.22   | -10.0(0.2)  | -10.0(0.21) |
| Trot | LDLJ-A   |                  |   | HC left  | 0.84   | -9.7(0.24)  | -9.7(0.24)  |
| Trot | LDLJ-A   |                  |   | HC right | 0.82   | -9.9(0.21)  | -9.9(0.23)  |
| Trot | LDLJ-A   |                  |   | FH       | 0.3    | -7.1(0.32)  | -7.2(0.23)  |
| Trot | LDLJ-A   |                  |   | Sa       | 0.063  | -8.3(0.21)  | -8.2(0.14)  |
| Trot | LDLJ-A   |                  |   | St       | 1      | -8.1(0.26)  | -8.1(0.25)  |
| Trot | LDLJ-A   |                  |   | Po       | 0.36   | -7.4(0.22)  | -7.5(0.27)  |
| Trot | RMSD     | Acceleration     | H | FC left  | 0.012  | 13.0(2.4)   | 18.0(4.2)   |
| Trot | RMSD     | Acceleration     | H | FC right | 0.016  | 13.0(2.7)   | 17.0(4.0)   |
| Trot | RMSD     | Acceleration     | H | HC left  | 0.016  | 10.0(2.0)   | 14.0(4.6)   |
| Trot | RMSD     | Acceleration     | H | HC right | 0.0039 | 10.0(2.2)   | 14.0(4.3)   |
| Trot | RMSD     | Acceleration     | H | FH       | 0.016  | 2.7(0.95)   | 3.2(1.0)    |
| Trot | RMSD     | Acceleration     | H | Sa       | 0.031  | 2.8(0.15)   | 3.4(0.31)   |
| Trot | RMSD     | Acceleration     | H | St       | 0.0078 | 2.7(0.45)   | 3.1(0.51)   |
| Trot | RMSD     | Acceleration     | H | Po       | 0.0078 | 4.5(1.1)    | 5.1(0.95)   |
| Trot | RMSD     | Acceleration     | X | FC left  | 0.02   | 13.0(3.3)   | 17.0(5.2)   |
| Trot | RMSD     | Acceleration     | X | FC right | 0.016  | 12.0(3.0)   | 17.0(5.7)   |
| Trot | RMSD     | Acceleration     | X | HC left  | 0.016  | 11.0(2.8)   | 15.0(5.3)   |
| Trot | RMSD     | Acceleration     | X | HC right | 0.0039 | 11.0(2.8)   | 16.0(3.9)   |
| Trot | RMSD     | Acceleration     | X | FH       | 0.016  | 3.1(0.55)   | 3.6(0.65)   |
| Trot | RMSD     | Acceleration     | X | Sa       | 0.031  | 2.2(0.31)   | 3.0(0.81)   |
| Trot | RMSD     | Acceleration     | X | St       | 0.0078 | 2.7(0.51)   | 3.2(0.55)   |
| Trot | RMSD     | Acceleration     | X | Po       | 0.0039 | 3.3(0.54)   | 4.2(0.79)   |
| Trot | RMSD     | Acceleration     | Y | FC left  | 0.027  | 21.0(5.1)   | 30.0(9.0)   |
| Trot | RMSD     | Acceleration     | Y | FC right | 0.016  | 20.0(4.7)   | 29.0(11.0)  |
| Trot | RMSD     | Acceleration     | Y | HC left  | 0.039  | 15.0(4.1)   | 21.0(8.1)   |

|      |      |              |       |          |        |            |             |
|------|------|--------------|-------|----------|--------|------------|-------------|
| Trot | RMSD | Acceleration | Y     | HC right | 0.0039 | 16.0(3.8)  | 23.0(7.3)   |
| Trot | RMSD | Acceleration | Y     | FH       | 0.016  | 2.2(0.57)  | 2.8(0.98)   |
| Trot | RMSD | Acceleration | Y     | Sa       | 0.063  | 3.2(1.0)   | 4.5(1.7)    |
| Trot | RMSD | Acceleration | Y     | St       | 0.0039 | 2.3(0.48)  | 3.1(1.0)    |
| Trot | RMSD | Acceleration | Y     | Po       | 0.0039 | 2.3(0.39)  | 3.0(0.82)   |
| Trot | RMSD | Acceleration | Z     | FC left  | 0.0078 | 9.8(2.0)   | 12.0(2.4)   |
| Trot | RMSD | Acceleration | Z     | FC right | 0.016  | 8.7(1.4)   | 11.0(1.6)   |
| Trot | RMSD | Acceleration | Z     | HC left  | 0.039  | 8.3(1.4)   | 10.0(3.2)   |
| Trot | RMSD | Acceleration | Z     | HC right | 0.0039 | 9.0(1.6)   | 12.0(2.5)   |
| Trot | RMSD | Acceleration | Z     | FH       | 0.016  | 2.0(0.45)  | 2.7(0.79)   |
| Trot | RMSD | Acceleration | Z     | Sa       | 0.031  | 2.0(0.5)   | 2.7(0.59)   |
| Trot | RMSD | Acceleration | Z     | St       | 0.012  | 2.1(0.44)  | 2.4(0.48)   |
| Trot | RMSD | Acceleration | Z     | Po       | 0.0039 | 2.1(0.44)  | 2.7(0.37)   |
| Trot | RMSD | Acceleration | V     | FC left  | 0.0078 | 27.0(2.5)  | 31.0(4.7)   |
| Trot | RMSD | Acceleration | V     | FC right | 0.031  | 26.0(3.1)  | 29.0(3.5)   |
| Trot | RMSD | Acceleration | V     | HC left  | 0.039  | 22.0(1.4)  | 25.0(3.4)   |
| Trot | RMSD | Acceleration | V     | HC right | 0.0039 | 23.0(2.2)  | 26.0(2.5)   |
| Trot | RMSD | Acceleration | V     | FH       | 0.81   | 11.0(1.9)  | 11.0(2.3)   |
| Trot | RMSD | Acceleration | V     | Sa       | 0.031  | 2.2(0.42)  | 2.8(0.54)   |
| Trot | RMSD | Acceleration | V     | St       | 0.02   | 2.2(0.33)  | 2.5(0.42)   |
| Trot | RMSD | Acceleration | V     | Po       | 0.02   | 4.4(2.1)   | 5.0(2.0)    |
| Trot | RMSD | Angle        | Swing | FC left  | 0.012  | 4.9(2.0)   | 6.8(2.4)    |
| Trot | RMSD | Angle        | Swing | FC right | 0.078  | 5.2(2.4)   | 6.8(2.8)    |
| Trot | RMSD | Angle        | Swing | HC left  | 0.078  | 4.5(1.2)   | 7.2(4.6)    |
| Trot | RMSD | Angle        | Swing | HC right | 0.02   | 4.5(0.91)  | 7.0(2.9)    |
| Trot | RMSD | Angle        | Twist | FC left  | 0.0078 | 69.0(16.0) | 150.0(76.0) |
| Trot | RMSD | Angle        | Twist | FC right | 0.016  | 88.0(11.0) | 120.0(41.0) |
| Trot | RMSD | Angle        | Twist | HC left  | 0.039  | 51.0(19.0) | 110.0(67.0) |
| Trot | RMSD | Angle        | Twist | HC right | 0.055  | 83.0(12.0) | 110.0(51.0) |
| Trot | RMSD | Angle        | X/V   | FC left  | 0.0039 | 5.7(2.7)   | 12.0(7.6)   |
| Trot | RMSD | Angle        | X/V   | FC right | 0.016  | 5.6(2.8)   | 17.0(16.0)  |
| Trot | RMSD | Angle        | X/V   | HC left  | 0.0078 | 5.0(2.8)   | 9.4(5.9)    |
| Trot | RMSD | Angle        | X/V   | HC right | 0.074  | 4.2(2.2)   | 8.2(7.7)    |
| Trot | RMSD | Angle        | X/V   | FH       | 0.11   | 4.5(1.4)   | 5.6(2.3)    |
| Trot | RMSD | Angle        | X/V   | Sa       | 0.16   | 2.1(0.61)  | 3.1(1.5)    |
| Trot | RMSD | Angle        | X/V   | St       | 0.0039 | 2.3(0.52)  | 3.7(1.6)    |
| Trot | RMSD | Angle        | X/V   | Po       | 0.055  | 5.0(0.79)  | 7.3(4.3)    |
| Trot | RMSD | Angle        | Y/V   | FC left  | 0.074  | 10.0(7.7)  | 22.0(19.0)  |
| Trot | RMSD | Angle        | Y/V   | FC right | 0.016  | 8.4(7.7)   | 25.0(21.0)  |
| Trot | RMSD | Angle        | Y/V   | HC left  | 0.11   | 6.8(5.5)   | 16.0(15.0)  |
| Trot | RMSD | Angle        | Y/V   | HC right | 0.2    | 7.3(5.1)   | 15.0(14.0)  |
| Trot | RMSD | Angle        | Y/V   | FH       | 0.078  | 3.6(0.8)   | 4.0(1.1)    |
| Trot | RMSD | Angle        | Y/V   | Sa       | 0.031  | 4.9(1.3)   | 6.0(1.8)    |
| Trot | RMSD | Angle        | Y/V   | St       | 0.055  | 3.7(1.1)   | 5.4(2.0)    |
| Trot | RMSD | Angle        | Y/V   | Po       | 0.02   | 3.4(0.77)  | 4.7(2.6)    |
| Trot | RMSD | Angle        | Z/V   | FC left  | 0.012  | 4.9(2.0)   | 6.8(2.4)    |
| Trot | RMSD | Angle        | Z/V   | FC right | 0.078  | 5.2(2.4)   | 6.8(2.8)    |
| Trot | RMSD | Angle        | Z/V   | HC left  | 0.078  | 4.5(1.2)   | 7.2(4.6)    |
| Trot | RMSD | Angle        | Z/V   | HC right | 0.02   | 4.5(0.91)  | 7.0(2.9)    |
| Trot | RMSD | Angle        | Z/V   | FH       | 0.031  | 5.5(1.2)   | 8.2(5.0)    |

|      |       |                  |     |          |        |             |             |
|------|-------|------------------|-----|----------|--------|-------------|-------------|
| Trot | RMSD  | Angle            | Z/V | Sa       | 0.031  | 2.5(0.72)   | 3.7(1.5)    |
| Trot | RMSD  | Angle            | Z/V | St       | 0.0039 | 2.6(0.48)   | 4.4(1.7)    |
| Trot | RMSD  | Angle            | Z/V | Po       | 0.0078 | 4.9(0.87)   | 7.7(3.6)    |
| Trot | RMSD  | Angular Velocity | X   | FC left  | 0.0039 | 1.8(0.48)   | 2.6(0.59)   |
| Trot | RMSD  | Angular Velocity | X   | FC right | 0.016  | 1.7(0.44)   | 2.4(0.87)   |
| Trot | RMSD  | Angular Velocity | X   | HC left  | 0.0078 | 1.3(0.36)   | 1.9(0.85)   |
| Trot | RMSD  | Angular Velocity | X   | HC right | 0.0039 | 1.3(0.31)   | 1.9(0.67)   |
| Trot | RMSD  | Angular Velocity | X   | FH       | 0.016  | 0.47(0.14)  | 0.63(0.27)  |
| Trot | RMSD  | Angular Velocity | X   | Sa       | 0.16   | 0.86(0.45)  | 1.0(0.42)   |
| Trot | RMSD  | Angular Velocity | X   | St       | 0.0039 | 0.36(0.15)  | 0.56(0.29)  |
| Trot | RMSD  | Angular Velocity | X   | Po       | 0.0039 | 0.36(0.078) | 0.45(0.11)  |
| Trot | RMSD  | Angular Velocity | Y   | FC left  | 0.0078 | 0.83(0.37)  | 1.3(0.41)   |
| Trot | RMSD  | Angular Velocity | Y   | FC right | 0.031  | 0.78(0.29)  | 1.2(0.41)   |
| Trot | RMSD  | Angular Velocity | Y   | HC left  | 0.023  | 0.67(0.2)   | 0.93(0.48)  |
| Trot | RMSD  | Angular Velocity | Y   | HC right | 0.0039 | 0.71(0.16)  | 1.0(0.27)   |
| Trot | RMSD  | Angular Velocity | Y   | FH       | 0.031  | 0.44(0.11)  | 0.53(0.23)  |
| Trot | RMSD  | Angular Velocity | Y   | Sa       | 0.031  | 0.25(0.038) | 0.33(0.037) |
| Trot | RMSD  | Angular Velocity | Y   | St       | 0.0078 | 0.29(0.065) | 0.39(0.1)   |
| Trot | RMSD  | Angular Velocity | Y   | Po       | 0.055  | 0.42(0.1)   | 0.48(0.19)  |
| Trot | RMSD  | Angular Velocity | Z   | FC left  | 0.074  | 1.8(0.99)   | 3.4(2.4)    |
| Trot | RMSD  | Angular Velocity | Z   | FC right | 0.031  | 1.6(1.0)    | 3.6(2.8)    |
| Trot | RMSD  | Angular Velocity | Z   | HC left  | 0.055  | 1.3(0.72)   | 2.6(1.9)    |
| Trot | RMSD  | Angular Velocity | Z   | HC right | 0.02   | 1.4(0.67)   | 2.4(1.7)    |
| Trot | RMSD  | Angular Velocity | Z   | FH       | 0.016  | 0.29(0.07)  | 0.36(0.1)   |
| Trot | RMSD  | Angular Velocity | Z   | Sa       | 0.063  | 0.22(0.09)  | 0.27(0.11)  |
| Trot | RMSD  | Angular Velocity | Z   | St       | 0.02   | 0.32(0.13)  | 0.59(0.38)  |
| Trot | RMSD  | Angular Velocity | Z   | Po       | 0.0039 | 0.38(0.099) | 0.5(0.18)   |
| Trot | SPARC | Acceleration     | H   | FC left  | 1      | -5.0(0.51)  | -5.0(0.45)  |
| Trot | SPARC | Acceleration     | H   | FC right | 0.16   | -4.9(0.72)  | -5.1(0.55)  |
| Trot | SPARC | Acceleration     | H   | HC left  | 0.55   | -4.1(0.36)  | -4.3(0.38)  |
| Trot | SPARC | Acceleration     | H   | HC right | 0.73   | -5.6(0.71)  | -5.5(0.66)  |
| Trot | SPARC | Acceleration     | H   | FH       | 0.81   | -4.9(0.72)  | -4.8(0.41)  |
| Trot | SPARC | Acceleration     | H   | Sa       | 0.44   | -4.1(0.26)  | -4.3(0.3)   |
| Trot | SPARC | Acceleration     | H   | St       | 0.91   | -4.4(0.52)  | -4.4(0.41)  |
| Trot | SPARC | Acceleration     | H   | Po       | 0.82   | -4.7(0.69)  | -4.8(0.22)  |
| Trot | SPARC | Acceleration     | X   | FC left  | 0.2    | -5.5(0.72)  | -5.8(0.32)  |
| Trot | SPARC | Acceleration     | X   | FC right | 0.16   | -5.6(0.83)  | -5.8(0.52)  |
| Trot | SPARC | Acceleration     | X   | HC left  | 0.31   | -5.3(0.65)  | -5.6(0.61)  |
| Trot | SPARC | Acceleration     | X   | HC right | 1      | -5.4(0.74)  | -5.4(0.58)  |
| Trot | SPARC | Acceleration     | X   | FH       | 0.94   | -5.3(0.62)  | -5.3(0.35)  |
| Trot | SPARC | Acceleration     | X   | Sa       | 1      | -9.0(1.0)   | -9.0(0.82)  |
| Trot | SPARC | Acceleration     | X   | St       | 0.43   | -9.4(2.2)   | -9.7(1.7)   |
| Trot | SPARC | Acceleration     | X   | Po       | 0.91   | -8.5(2.1)   | -8.5(1.1)   |
| Trot | SPARC | Acceleration     | Y   | FC left  | 0.3    | -11.0(2.2)  | -12.0(1.7)  |
| Trot | SPARC | Acceleration     | Y   | FC right | 0.38   | -11.0(2.0)  | -11.0(1.3)  |
| Trot | SPARC | Acceleration     | Y   | HC left  | 0.15   | -11.0(1.8)  | -12.0(1.2)  |
| Trot | SPARC | Acceleration     | Y   | HC right | 1      | -12.0(2.0)  | -12.0(1.4)  |
| Trot | SPARC | Acceleration     | Y   | FH       | 0.94   | -12.0(2.1)  | -13.0(2.1)  |
| Trot | SPARC | Acceleration     | Y   | Sa       | 1      | -11.0(1.6)  | -11.0(1.3)  |
| Trot | SPARC | Acceleration     | Y   | St       | 0.3    | -11.0(2.2)  | -10.0(2.3)  |



|      |       |                  |       |          |       |             |             |
|------|-------|------------------|-------|----------|-------|-------------|-------------|
| Trot | SPARC | Acceleration     | Y     | Po       | 0.25  | -10.0(2.4)  | -11.0(2.4)  |
| Trot | SPARC | Acceleration     | Z     | FC left  | 0.91  | -12.0(3.7)  | -12.0(2.0)  |
| Trot | SPARC | Acceleration     | Z     | FC right | 0.69  | -12.0(3.9)  | -12.0(3.0)  |
| Trot | SPARC | Acceleration     | Z     | HC left  | 0.64  | -13.0(2.3)  | -13.0(1.6)  |
| Trot | SPARC | Acceleration     | Z     | HC right | 1     | -14.0(2.1)  | -14.0(2.1)  |
| Trot | SPARC | Acceleration     | Z     | FH       | 0.81  | -8.8(2.1)   | -8.7(1.8)   |
| Trot | SPARC | Acceleration     | Z     | Sa       | 1     | -5.3(0.3)   | -5.3(0.42)  |
| Trot | SPARC | Acceleration     | Z     | St       | 1     | -4.8(0.24)  | -4.8(0.4)   |
| Trot | SPARC | Acceleration     | Z     | Po       | 0.055 | -4.9(0.44)  | -5.1(0.56)  |
| Trot | SPARC | Acceleration     | V     | FC left  | 0.039 | -7.5(1.8)   | -8.5(1.6)   |
| Trot | SPARC | Acceleration     | V     | FC right | 0.11  | -7.8(2.0)   | -8.9(1.7)   |
| Trot | SPARC | Acceleration     | V     | HC left  | 0.078 | -11.0(1.2)  | -11.0(1.2)  |
| Trot | SPARC | Acceleration     | V     | HC right | 0.91  | -8.2(2.3)   | -8.3(2.6)   |
| Trot | SPARC | Acceleration     | V     | FH       | 0.81  | -5.6(0.84)  | -5.4(0.47)  |
| Trot | SPARC | Acceleration     | V     | Sa       | 0.69  | -5.3(0.34)  | -5.4(0.44)  |
| Trot | SPARC | Acceleration     | V     | St       | 0.57  | -4.9(0.3)   | -4.9(0.35)  |
| Trot | SPARC | Acceleration     | V     | Po       | 0.91  | -5.5(1.1)   | -5.5(1.0)   |
| Trot | SPARC | Angle            | Swing | FC left  | 0.73  | -2.5(0.087) | -2.5(0.092) |
| Trot | SPARC | Angle            | Swing | FC right | 0.81  | -2.4(0.12)  | -2.5(0.15)  |
| Trot | SPARC | Angle            | Swing | HC left  | 0.55  | -2.5(0.089) | -2.4(0.068) |
| Trot | SPARC | Angle            | Swing | HC right | 0.25  | -2.5(0.1)   | -2.4(0.032) |
| Trot | SPARC | Angle            | Twist | FC left  | 0.82  | -2.8(0.4)   | -2.8(0.35)  |
| Trot | SPARC | Angle            | Twist | FC right | 0.47  | -2.8(0.37)  | -2.6(0.1)   |
| Trot | SPARC | Angle            | Twist | HC left  | 0.46  | -2.5(0.17)  | -2.5(0.097) |
| Trot | SPARC | Angle            | Twist | HC right | 0.13  | -2.8(0.26)  | -2.6(0.13)  |
| Trot | SPARC | Angle            | X/V   | FC left  | 0.16  | -2.6(0.11)  | -2.7(0.13)  |
| Trot | SPARC | Angle            | X/V   | FC right | 1     | -2.7(0.12)  | -2.7(0.13)  |
| Trot | SPARC | Angle            | X/V   | HC left  | 0.38  | -2.5(0.12)  | -2.5(0.053) |
| Trot | SPARC | Angle            | X/V   | HC right | 0.91  | -2.5(0.11)  | -2.5(0.078) |
| Trot | SPARC | Angle            | X/V   | FH       | 0.22  | -2.4(0.038) | -2.4(0.01)  |
| Trot | SPARC | Angle            | X/V   | Sa       | 0.44  | -2.4(0.034) | -2.4(0.042) |
| Trot | SPARC | Angle            | X/V   | St       | 1     | -2.5(0.094) | -2.5(0.071) |
| Trot | SPARC | Angle            | X/V   | Po       | 0.16  | -2.4(0.069) | -2.4(0.061) |
| Trot | SPARC | Angle            | Y/V   | FC left  | 0.43  | -2.9(0.25)  | -3.0(0.13)  |
| Trot | SPARC | Angle            | Y/V   | FC right | 0.3   | -2.8(0.26)  | -2.9(0.12)  |
| Trot | SPARC | Angle            | Y/V   | HC left  | 0.2   | -2.6(0.15)  | -2.6(0.12)  |
| Trot | SPARC | Angle            | Y/V   | HC right | 0.5   | -2.7(0.12)  | -2.7(0.12)  |
| Trot | SPARC | Angle            | Y/V   | FH       | 0.47  | -2.5(0.058) | -2.4(0.049) |
| Trot | SPARC | Angle            | Y/V   | Sa       | 0.31  | -2.4(0.14)  | -2.5(0.075) |
| Trot | SPARC | Angle            | Y/V   | St       | 0.57  | -2.4(0.057) | -2.4(0.051) |
| Trot | SPARC | Angle            | Y/V   | Po       | 0.36  | -2.4(0.032) | -2.4(0.067) |
| Trot | SPARC | Angle            | Z/V   | FC left  | 0.73  | -2.5(0.087) | -2.5(0.092) |
| Trot | SPARC | Angle            | Z/V   | FC right | 0.81  | -2.4(0.12)  | -2.5(0.15)  |
| Trot | SPARC | Angle            | Z/V   | HC left  | 0.55  | -2.5(0.089) | -2.4(0.068) |
| Trot | SPARC | Angle            | Z/V   | HC right | 0.25  | -2.5(0.1)   | -2.4(0.032) |
| Trot | SPARC | Angle            | Z/V   | FH       | 0.11  | -2.4(0.07)  | -2.4(0.053) |
| Trot | SPARC | Angle            | Z/V   | Sa       | 0.16  | -2.9(0.5)   | -3.1(0.8)   |
| Trot | SPARC | Angle            | Z/V   | St       | 0.3   | -2.4(0.02)  | -2.4(0.034) |
| Trot | SPARC | Angle            | Z/V   | Po       | 0.65  | -2.5(0.14)  | -2.6(0.41)  |
| Trot | SPARC | Angular Velocity | X     | FC left  | 0.43  | -14.0(2.5)  | -15.0(2.1)  |

|      |                |                  |   |          |       |             |            |
|------|----------------|------------------|---|----------|-------|-------------|------------|
| Trot | SPARC          | Angular Velocity | X | FC right | 0.3   | -14.0(3.3)  | -15.0(2.1) |
| Trot | SPARC          | Angular Velocity | X | HC left  | 0.64  | -13.0(2.5)  | -13.0(2.3) |
| Trot | SPARC          | Angular Velocity | X | HC right | 0.65  | -14.0(1.8)  | -14.0(3.0) |
| Trot | SPARC          | Angular Velocity | X | FH       | 0.81  | -11.0(1.9)  | -12.0(1.6) |
| Trot | SPARC          | Angular Velocity | X | Sa       | 0.84  | -10.0(1.7)  | -10.0(2.1) |
| Trot | SPARC          | Angular Velocity | X | St       | 0.57  | -12.0(1.9)  | -12.0(1.4) |
| Trot | SPARC          | Angular Velocity | X | Po       | 0.57  | -11.0(2.4)  | -12.0(1.7) |
| Trot | SPARC          | Angular Velocity | Y | FC left  | 0.65  | -11.0(2.1)  | -10.0(2.4) |
| Trot | SPARC          | Angular Velocity | Y | FC right | 0.69  | -11.0(2.6)  | -10.0(1.6) |
| Trot | SPARC          | Angular Velocity | Y | HC left  | 0.38  | -12.0(2.1)  | -13.0(1.7) |
| Trot | SPARC          | Angular Velocity | Y | HC right | 0.82  | -11.0(2.6)  | -12.0(3.2) |
| Trot | SPARC          | Angular Velocity | Y | FH       | 0.69  | -9.7(3.6)   | -9.9(2.3)  |
| Trot | SPARC          | Angular Velocity | Y | Sa       | 0.44  | -8.3(1.8)   | -8.5(1.1)  |
| Trot | SPARC          | Angular Velocity | Y | St       | 0.055 | -7.3(1.2)   | -7.8(1.1)  |
| Trot | SPARC          | Angular Velocity | Y | Po       | 0.36  | -9.9(3.6)   | -10.0(3.0) |
| Trot | SPARC          | Angular Velocity | Z | FC left  | 0.5   | -6.9(0.91)  | -7.2(0.71) |
| Trot | SPARC          | Angular Velocity | Z | FC right | 0.38  | -6.7(0.92)  | -7.0(0.4)  |
| Trot | SPARC          | Angular Velocity | Z | HC left  | 0.64  | -7.2(0.84)  | -7.3(0.54) |
| Trot | SPARC          | Angular Velocity | Z | HC right | 0.25  | -7.3(1.1)   | -7.6(1.0)  |
| Trot | SPARC          | Angular Velocity | Z | FH       | 0.94  | -9.9(2.0)   | -10.0(1.6) |
| Trot | SPARC          | Angular Velocity | Z | Sa       | 0.063 | -7.9(1.0)   | -8.6(1.6)  |
| Trot | SPARC          | Angular Velocity | Z | St       | 0.82  | -7.8(1.1)   | -7.9(1.1)  |
| Trot | SPARC          | Angular Velocity | Z | Po       | 0.25  | -13.0(2.1)  | -12.0(1.6) |
| Trot | PARC per strid | Acceleration     | H | FC left  | 0.57  | -2.8(0.29)  | -2.7(0.29) |
| Trot | PARC per strid | Acceleration     | H | FC right | 0.16  | -2.5(0.18)  | -2.7(0.25) |
| Trot | PARC per strid | Acceleration     | H | HC left  | 0.84  | -2.3(0.26)  | -2.4(0.42) |
| Trot | PARC per strid | Acceleration     | H | HC right | 0.91  | -2.3(0.22)  | -2.3(0.24) |
| Trot | PARC per strid | Acceleration     | H | FH       | 0.11  | -3.4(0.34)  | -3.2(0.39) |
| Trot | PARC per strid | Acceleration     | H | Sa       | 1     | -2.7(0.099) | -2.7(0.11) |
| Trot | PARC per strid | Acceleration     | H | St       | 0.82  | -2.8(0.44)  | -2.8(0.26) |
| Trot | PARC per strid | Acceleration     | H | Po       | 0.65  | -3.1(0.35)  | -3.1(0.26) |
| Trot | PARC per strid | Acceleration     | X | FC left  | 0.13  | -2.9(0.29)  | -3.0(0.27) |
| Trot | PARC per strid | Acceleration     | X | FC right | 0.94  | -2.6(0.29)  | -2.7(0.3)  |
| Trot | PARC per strid | Acceleration     | X | HC left  | 0.74  | -2.6(0.37)  | -2.6(0.46) |
| Trot | PARC per strid | Acceleration     | X | HC right | 1     | -2.8(0.35)  | -2.7(0.41) |
| Trot | PARC per strid | Acceleration     | X | FH       | 1     | -3.8(0.34)  | -3.8(0.42) |
| Trot | PARC per strid | Acceleration     | X | Sa       | 0.56  | -4.6(0.32)  | -4.5(0.41) |
| Trot | PARC per strid | Acceleration     | X | St       | 1     | -4.8(0.8)   | -4.9(0.67) |
| Trot | PARC per strid | Acceleration     | X | Po       | 0.73  | -4.6(0.55)  | -4.7(0.31) |
| Trot | PARC per strid | Acceleration     | Y | FC left  | 0.5   | -4.9(1.0)   | -5.0(1.0)  |
| Trot | PARC per strid | Acceleration     | Y | FC right | 0.078 | -4.2(0.4)   | -4.5(0.42) |
| Trot | PARC per strid | Acceleration     | Y | HC left  | 0.46  | -3.4(0.48)  | -3.6(0.89) |
| Trot | PARC per strid | Acceleration     | Y | HC right | 0.91  | -4.1(0.71)  | -3.9(0.59) |
| Trot | PARC per strid | Acceleration     | Y | FH       | 0.078 | -4.7(0.43)  | -4.1(0.4)  |
| Trot | PARC per strid | Acceleration     | Y | Sa       | 0.56  | -5.0(0.66)  | -5.1(0.6)  |
| Trot | PARC per strid | Acceleration     | Y | St       | 0.02  | -4.5(0.75)  | -4.0(0.64) |
| Trot | PARC per strid | Acceleration     | Y | Po       | 0.82  | -4.1(0.46)  | -4.2(0.38) |
| Trot | PARC per strid | Acceleration     | Z | FC left  | 0.65  | -3.7(0.87)  | -3.7(0.72) |
| Trot | PARC per strid | Acceleration     | Z | FC right | 0.11  | -4.3(0.71)  | -4.0(0.6)  |
| Trot | PARC per strid | Acceleration     | Z | HC left  | 0.25  | -3.5(0.77)  | -3.7(0.77) |

|      |                |                  |       |          |        |             |             |
|------|----------------|------------------|-------|----------|--------|-------------|-------------|
| Trot | PARC per strid | Acceleration     | Z     | HC right | 0.039  | -4.1(0.46)  | -3.8(0.58)  |
| Trot | PARC per strid | Acceleration     | Z     | FH       | 1      | -4.3(0.63)  | -4.3(0.41)  |
| Trot | PARC per strid | Acceleration     | Z     | Sa       | 0.31   | -3.9(0.25)  | -3.8(0.27)  |
| Trot | PARC per strid | Acceleration     | Z     | St       | 0.3    | -3.6(0.25)  | -3.5(0.24)  |
| Trot | PARC per strid | Acceleration     | Z     | Po       | 1      | -3.5(0.31)  | -3.5(0.39)  |
| Trot | PARC per strid | Acceleration     | V     | FC left  | 0.25   | -3.1(0.43)  | -3.3(0.57)  |
| Trot | PARC per strid | Acceleration     | V     | FC right | 0.38   | -2.9(0.54)  | -3.3(0.76)  |
| Trot | PARC per strid | Acceleration     | V     | HC left  | 0.11   | -3.2(0.36)  | -3.0(0.35)  |
| Trot | PARC per strid | Acceleration     | V     | HC right | 0.82   | -3.1(0.52)  | -3.1(0.64)  |
| Trot | PARC per strid | Acceleration     | V     | FH       | 0.81   | -3.7(0.3)   | -3.8(0.39)  |
| Trot | PARC per strid | Acceleration     | V     | Sa       | 0.31   | -3.9(0.24)  | -3.8(0.28)  |
| Trot | PARC per strid | Acceleration     | V     | St       | 0.57   | -3.6(0.25)  | -3.6(0.24)  |
| Trot | PARC per strid | Acceleration     | V     | Po       | 0.43   | -3.7(0.42)  | -3.6(0.37)  |
| Trot | PARC per strid | Angle            | Swing | FC left  | 0.43   | -2.5(0.092) | -2.5(0.1)   |
| Trot | PARC per strid | Angle            | Swing | FC right | 0.38   | -2.4(0.037) | -2.4(0.094) |
| Trot | PARC per strid | Angle            | Swing | HC left  | 1      | -2.3(0.059) | -2.3(0.061) |
| Trot | PARC per strid | Angle            | Swing | HC right | 0.82   | -2.4(0.043) | -2.4(0.068) |
| Trot | PARC per strid | Angle            | Twist | FC left  | 0.57   | -2.3(0.1)   | -2.3(0.11)  |
| Trot | PARC per strid | Angle            | Twist | FC right | 0.81   | -2.2(0.26)  | -2.2(0.14)  |
| Trot | PARC per strid | Angle            | Twist | HC left  | 0.55   | -2.4(0.057) | -2.4(0.07)  |
| Trot | PARC per strid | Angle            | Twist | HC right | 0.0039 | -2.1(0.14)  | -2.4(0.072) |
| Trot | PARC per strid | Angle            | X/V   | FC left  | 0.65   | -2.5(0.14)  | -2.5(0.11)  |
| Trot | PARC per strid | Angle            | X/V   | FC right | 0.81   | -2.3(0.19)  | -2.3(0.21)  |
| Trot | PARC per strid | Angle            | X/V   | HC left  | 0.95   | -2.4(0.081) | -2.4(0.091) |
| Trot | PARC per strid | Angle            | X/V   | HC right | 0.65   | -2.4(0.085) | -2.4(0.07)  |
| Trot | PARC per strid | Angle            | X/V   | FH       | 0.81   | -2.4(0.016) | -2.4(0.016) |
| Trot | PARC per strid | Angle            | X/V   | Sa       | 0.84   | -2.4(0.072) | -2.4(0.074) |
| Trot | PARC per strid | Angle            | X/V   | St       | 0.055  | -2.5(0.036) | -2.5(0.051) |
| Trot | PARC per strid | Angle            | X/V   | Po       | 1      | -2.4(0.04)  | -2.4(0.039) |
| Trot | PARC per strid | Angle            | Y/V   | FC left  | 0.65   | -2.2(0.36)  | -2.2(0.32)  |
| Trot | PARC per strid | Angle            | Y/V   | FC right | 1      | -2.4(0.39)  | -2.4(0.31)  |
| Trot | PARC per strid | Angle            | Y/V   | HC left  | 0.84   | -2.4(0.093) | -2.4(0.07)  |
| Trot | PARC per strid | Angle            | Y/V   | HC right | 0.2    | -2.1(0.13)  | -2.1(0.084) |
| Trot | PARC per strid | Angle            | Y/V   | FH       | 0.3    | -2.4(0.024) | -2.4(0.02)  |
| Trot | PARC per strid | Angle            | Y/V   | Sa       | 0.31   | -2.5(0.12)  | -2.4(0.085) |
| Trot | PARC per strid | Angle            | Y/V   | St       | 0.57   | -2.5(0.058) | -2.5(0.065) |
| Trot | PARC per strid | Angle            | Y/V   | Po       | 0.82   | -2.4(0.045) | -2.4(0.027) |
| Trot | PARC per strid | Angle            | Z/V   | FC left  | 0.43   | -2.5(0.092) | -2.5(0.1)   |
| Trot | PARC per strid | Angle            | Z/V   | FC right | 0.38   | -2.4(0.037) | -2.4(0.094) |
| Trot | PARC per strid | Angle            | Z/V   | HC left  | 1      | -2.3(0.059) | -2.3(0.061) |
| Trot | PARC per strid | Angle            | Z/V   | HC right | 0.82   | -2.4(0.043) | -2.4(0.068) |
| Trot | PARC per strid | Angle            | Z/V   | FH       | 0.38   | -2.4(0.036) | -2.4(0.03)  |
| Trot | PARC per strid | Angle            | Z/V   | Sa       | 0.69   | -2.4(0.37)  | -2.3(0.2)   |
| Trot | PARC per strid | Angle            | Z/V   | St       | 0.2    | -2.4(0.052) | -2.4(0.032) |
| Trot | PARC per strid | Angle            | Z/V   | Po       | 0.3    | -2.4(0.11)  | -2.3(0.15)  |
| Trot | PARC per strid | Angular Velocity | X     | FC left  | 0.82   | -4.5(1.5)   | -4.3(1.1)   |
| Trot | PARC per strid | Angular Velocity | X     | FC right | 0.47   | -5.3(1.9)   | -5.9(1.4)   |
| Trot | PARC per strid | Angular Velocity | X     | HC left  | 0.15   | -4.9(0.86)  | -4.5(0.93)  |
| Trot | PARC per strid | Angular Velocity | X     | HC right | 0.3    | -4.8(0.84)  | -4.5(0.95)  |
| Trot | PARC per strid | Angular Velocity | X     | FH       | 0.58   | -4.1(0.64)  | -3.9(0.48)  |

|      |                |                  |      |          |       |            |             |
|------|----------------|------------------|------|----------|-------|------------|-------------|
| Trot | PARC per strid | Angular Velocity | X    | Sa       | 0.69  | -4.9(0.55) | -4.8(0.48)  |
| Trot | PARC per strid | Angular Velocity | X    | St       | 0.039 | -4.6(0.45) | -4.4(0.31)  |
| Trot | PARC per strid | Angular Velocity | X    | Po       | 0.73  | -4.0(0.4)  | -4.0(0.67)  |
| Trot | PARC per strid | Angular Velocity | Y    | FC left  | 0.36  | -3.7(1.0)  | -3.5(0.74)  |
| Trot | PARC per strid | Angular Velocity | Y    | FC right | 0.38  | -4.2(0.9)  | -3.9(0.97)  |
| Trot | PARC per strid | Angular Velocity | Y    | HC left  | 0.55  | -4.7(0.84) | -5.0(0.78)  |
| Trot | PARC per strid | Angular Velocity | Y    | HC right | 1     | -4.5(0.85) | -4.2(0.65)  |
| Trot | PARC per strid | Angular Velocity | Y    | FH       | 0.3   | -4.0(0.53) | -3.8(0.44)  |
| Trot | PARC per strid | Angular Velocity | Y    | Sa       | 0.44  | -4.1(0.45) | -4.1(0.3)   |
| Trot | PARC per strid | Angular Velocity | Y    | St       | 0.57  | -3.8(0.32) | -3.9(0.26)  |
| Trot | PARC per strid | Angular Velocity | Y    | Po       | 0.055 | -3.8(0.55) | -3.6(0.42)  |
| Trot | PARC per strid | Angular Velocity | Z    | FC left  | 0.91  | -3.7(0.93) | -3.7(0.99)  |
| Trot | PARC per strid | Angular Velocity | Z    | FC right | 0.58  | -3.8(0.82) | -4.0(0.85)  |
| Trot | PARC per strid | Angular Velocity | Z    | HC left  | 0.95  | -3.3(0.21) | -3.3(0.26)  |
| Trot | PARC per strid | Angular Velocity | Z    | HC right | 1     | -3.3(0.15) | -3.3(0.25)  |
| Trot | PARC per strid | Angular Velocity | Z    | FH       | 0.031 | -3.9(0.46) | -3.6(0.41)  |
| Trot | PARC per strid | Angular Velocity | Z    | Sa       | 0.69  | -3.9(0.51) | -3.8(0.61)  |
| Trot | PARC per strid | Angular Velocity | Z    | St       | 0.36  | -3.6(0.39) | -3.7(0.45)  |
| Trot | PARC per strid | Angular Velocity | Z    | Po       | 0.2   | -4.2(0.46) | -4.0(0.4)   |
| Trot | PARC per strid | Angular Velocity | Norm | FC left  | 1     | -2.4(0.46) | -2.4(0.42)  |
| Trot | PARC per strid | Angular Velocity | Norm | FC right | 0.38  | -2.5(0.41) | -2.6(0.41)  |
| Trot | PARC per strid | Angular Velocity | Norm | HC left  | 0.46  | -2.4(0.2)  | -2.5(0.2)   |
| Trot | PARC per strid | Angular Velocity | Norm | HC right | 0.73  | -2.4(0.13) | -2.4(0.22)  |
| Trot | PARC per strid | Angular Velocity | Norm | FH       | 0.11  | -2.6(0.22) | -2.4(0.057) |
| Trot | PARC per strid | Angular Velocity | Norm | Sa       | 0.69  | -2.8(0.24) | -2.8(0.3)   |
| Trot | PARC per strid | Angular Velocity | Norm | St       | 0.36  | -2.5(0.1)  | -2.5(0.12)  |
| Trot | PARC per strid | Angular Velocity | Norm | Po       | 0.5   | -2.5(0.12) | -2.4(0.12)  |
| Trot | SPARC          | Angular Velocity | Norm | FC left  | 0.43  | -4.3(0.58) | -4.4(0.4)   |
| Trot | SPARC          | Angular Velocity | Norm | FC right | 0.58  | -4.2(0.64) | -4.4(0.086) |
| Trot | SPARC          | Angular Velocity | Norm | HC left  | 0.2   | -4.0(0.31) | -4.2(0.26)  |
| Trot | SPARC          | Angular Velocity | Norm | HC right | 0.91  | -4.0(0.37) | -4.0(0.26)  |
| Trot | SPARC          | Angular Velocity | Norm | FH       | 0.58  | -3.8(0.27) | -4.0(0.29)  |
| Trot | SPARC          | Angular Velocity | Norm | Sa       | 0.56  | -4.9(0.39) | -5.1(0.52)  |
| Trot | SPARC          | Angular Velocity | Norm | St       | 0.82  | -4.1(0.39) | -4.1(0.38)  |
| Trot | SPARC          | Angular Velocity | Norm | Po       | 0.43  | -3.6(0.29) | -3.8(0.27)  |
